1 **Title**

2  
3  
4 **Correlation of mitochondrial TOM core complex *stop-and-go* and open-closed**  
5 **channel dynamics**

6  
7  
8 **Authors**

9  
10 Shuo Wang<sup>1</sup>, Lukas Findeisen<sup>1</sup>, Sebastian Leptihn<sup>2</sup>, Mark I. Wallace<sup>3</sup>, Marcel Hörning<sup>4,\*</sup>,  
11 Stephan Nussberger<sup>1,\*</sup>

12  
13  
14 **Affiliations**

15  
16 <sup>1</sup> Department of Biophysics, Institute of Biomaterials and Biomolecular Systems,  
17 University of Stuttgart, Pfaffenwaldring 57, 70569 Stuttgart, Germany.

18 <sup>2</sup> Zhejiang University-University of Edinburgh (ZJU-UoE) Institute, Zhejiang University,  
19 718 East Haizhou Rd., Haining, Zhejiang 314400, China.

20 <sup>3</sup> Department of Chemistry, King's College London, Britannia House, 7 Trinity Street,  
21 London, United Kingdom.

22 <sup>4</sup> Department of Biobased Materials, Institute of Biomaterials and Biomolecular Systems,  
23 University of Stuttgart, Pfaffenwaldring 57, 70569 Stuttgart, Germany.

24  
25 \*Corresponding authors. Email: Stephan.Nussberger@bio.uni-stuttgart.de,  
26 Marcel.Hoerning@bio.uni-stuttgart.de

27  
28  
29 **Abstract**

30  
31 The role of lateral diffusion of proteins in the membrane in the context of function has not been  
32 examined extensively. Here, we explore the relationship between protein lateral diffusion and  
33 channel activity of the general protein import pore of mitochondria (TOM-CC). Optical ion flux  
34 sensing through single TOM-CC molecules shows that TOM-CC can occupy three ion  
35 permeability states. Whereas freely diffusing TOM-CC molecules are preferentially found in a  
36 high permeability state, physical tethering to an agarose support causes the channels to transition  
37 to intermediate and low permeability states. This data shows that combinatorial opening and  
38 closing of the two pores of TOM-CC correlates with lateral protein diffusion in the membrane  
39 plane, and that the complex has mechanosensitive-like properties. This is the first demonstration  
40 of  $\beta$ -barrel protein mechanosensitivity, and has direct conceptual consequences for the  
41 understanding of the process of mitochondrial protein import. Our approach provides a novel tool  
42 to simultaneously study the interplay of membrane protein diffusion and channel dynamics.  
43  
44  
45

## 46 Introduction

47

48 The TOM complex of the outer membrane of mitochondria is the main entry gate for nuclear-  
49 encoded proteins from the cytosol into mitochondria (Wiedemann and Pfanner, 2017). It does not  
50 act as an independent entity, but in a network of interacting protein complexes, which transiently  
51 cluster in mitochondrial outer- and inner-membrane contact sites (Pfanner et al., 2019; Scorrano  
52 et al., 2019; Wurm et al., 2011). Recent studies suggest a functional crosstalk between TOM and  
53 chaperones, which guide preproteins from the cytosol to mitochondria (Becker et al., 2019;  
54 Namba, 2019), cytosolic ribosomes (Gold et al., 2017), and the endoplasmic reticulum (Becker et  
55 al., 2019; Namba, 2019). For proteins destined for integration into the lipid bilayer of the inner  
56 mitochondrial membrane, TOM transiently cooperates with components of the inner membrane  
57 protein translocase TIM22. Proteins en route to the mitochondrial matrix require supercomplex  
58 formation with the inner membrane protein translocase TIM23 (Chacinska et al., 2005; Gold et  
59 al., 2014; Mokranjac et al., 2009). Thus, depending on the activity of mitochondria, the lateral  
60 mobility of TOM within the mitochondrial outer membrane may be fundamental to the different  
61 import needs of the organelle (Pfanner et al., 2019). The relationship between the mode of lateral  
62 mobility (Jacobson et al., 2019) and TOM protein function, however, has not yet been explored.  
63 In particular, it is important to know whether the main entry gate for nuclear-encoded proteins is  
64 open or closed when associated with structures at the membrane periphery, as this could have  
65 direct conceptual implications for mitochondrial protein import.

66

67 Detailed insights into the molecular architectures of the TOM core complex (TOM-CC) from *N.*  
68 *crassa* (Bausewein et al., 2017), *S. cerevisiae* (Araiso et al., 2019; Tucker and Park, 2019) and  
69 human (Wang et al., 2020) mitochondria have been obtained by cryo-electron microscopy  
70 (cryoEM). All three structures show well-conserved symmetrical dimers, where the monomer  
71 comprises five membrane protein subunits. Each of the two transmembrane  $\beta$ -barrel domains of  
72 the protein-conducting subunit Tom40 interacts with one subunit of Tom5, Tom6, and Tom7,  
73 respectively. Two central transmembrane Tom22 receptor proteins, reaching out into the cytosol  
74 and the mitochondrial inter membrane space (IMS), connect the two Tom40 pores at the dimer  
75 interface. The path of polypeptides through these pores is considered identical to the path of ions  
76 through the complex.

77

78 Previous studies reported that the TOM complex channels from wild-type yeast mitochondria are  
79 mainly in closed state (van Wilpe et al., 1999). However, TOM isolated from mutant *tom22* $\Delta$   
80 mitochondria without Tom22 was mainly found in open state (van Wilpe et al., 1999), resembling  
81 that observed with purified Tom40 (Ahting et al., 2001; Hill et al., 1998). This indicated that the  
82 “multifunctional organizer” Tom22 of the mitochondrial protein translocase negatively regulates  
83 the open probability of the Tom40 channels of the TOM-CC (van Wilpe et al., 1999).  
84 Nevertheless, the molecular mechanism of how Tom22 affects the open-closed channel activity  
85 of the TOM machinery has remained an open question.

86

87 Most studies that reported on the dynamic and functional properties of the TOM-CC channel have  
88 been based on ion current measurements through single TOM-CC channels in planar lipid  
89 membranes under application of a membrane potential ( $\Delta\psi_m$ ) (Ahting et al., 1999; Becker et al.,  
90 2005; Hill et al., 1998; Künkele et al., 1998; Kuszak et al., 2015; Mager et al., 2011; Mahendran  
91 et al., 2013). TOM-CC has been found to switch between a complex set of conductance states  
92 under this experimental setting. Tom22 has been proposed to contribute additional flexibility to  
93 the complex by reducing the energy required for transitions between these states (Poynor et al.,  
94 2008; Romero-Ruiz et al., 2010). However, the physiological significance of these voltage-  
95 dependent transitions has been controversially discussed because the critical voltage above which

96 TOM-CC channels close is significantly larger than any possible Donnan potential ( $\Delta\psi_{\text{Don}}$ ) across  
97 the outer mitochondrial membrane (Benz et al., 1990; Lemeshko and Lemeshko, 2000; Lemeshko,  
98 2002).

99  
100 In this work, we simultaneously probe and correlate the lateral mobility and the ion flux through  
101 single TOM-CC molecules by means of non-invasive Electrode-free Optical Single Channel  
102 Recording (Ef-oSCR) (Demuro and Parker, 2005; Huang et al., 2015; Leptihn et al., 2013; Wang  
103 et al., 2018; Yuqin Wang et al., 2019). Possible changes in ion flux associated with conformational  
104 changes of the TOM-CC are only caused by thermal fluctuations and the nature of lateral diffusion  
105 of the TOM-CC in the membrane. This leads to new insights into the open-closed dynamics of  
106 the TOM-CC channel and the corresponding nature of lateral movement, which are difficult to  
107 illuminate by voltage-clamp, biochemical assays or structural analysis (Davis et al., 2021).

108  
109 We find that freely diffusing TOM-CC molecules stall when interacting with structures adjacent  
110 to the membrane, ostensibly due to interaction between the extended polar domains of Tom22 and  
111 a supporting agarose layer. Concomitantly, with transient or permanent suspension of movement,  
112 the TOM-CC switches from active (both pores open) to weakly active (one pore open) and  
113 inactive (both pores closed) states.

114  
115 The strong temporal correlation between lateral mobility and channel activity suggests that TOM-  
116 CC function is highly sensitive to lateral diffusion and mechanical constraints. Taken alongside  
117 recent cryo-electron microscopy of this enigmatic complex, we argue that these dynamics provide  
118 a new functionality of the TOM-CC that has not been anticipated before. From a general  
119 perspective, for the best of our knowledge this is the first demonstration of  $\beta$ -barrel protein  
120 mechanoregulation and the causal effect of lateral diffusion. So far, mechanosensitivity has only  
121 been observed in primarily  $\alpha$ -helical protein channels. The applied experimental approach can be  
122 easily transferred to other systems, where channel activity additionally to lateral membrane  
123 diffusion is of importance.

## 124 125 126 **Results**

### 127 128 **Visualizing the open-closed channel activity of TOM-CC**

129 Owing to the unresolved complexity of the mitochondrial outer membrane, TOM-CC was isolated  
130 from a *N. crassa* strain, that carries a version of subunit Tom22 with a hexahistidine tag at the C-  
131 terminus (Fig. 1A), and reconstituted into a well-defined supported lipid membrane (Kiessling et  
132 al., 2015; Sackmann, 1996; Tanaka and Sackmann, 2005). Droplet interface membranes (DIBs)  
133 were created through contact of lipid monolayer-coated aqueous droplets in a lipid/oil phase and  
134 a lipid monolayer on top of an agarose hydrogel (Huang et al., 2015; Leptihn et al., 2013; Wang  
135 et al., 2018; Yuqin Wang et al., 2019). The *cis* side of the membrane contained  $\text{Ca}^{2+}$ -ions, while  
136 having a  $\text{Ca}^{2+}$ -sensitive fluorescent dye (Fluo-8) at the *trans* side.  $\text{Ca}^{2+}$ -ion flux through individual  
137 TOM-CCs was measured by monitoring Fluo-8 emission in close proximity to the membrane  
138 using TIRF microscopy in the absence of membrane potential (Ef-oSCR) to avoid voltage-  
139 dependent TOM-CC gating (Figs. 1B and 1C).

140  
141 Contrary to the classical single molecule tracking approach using single fluorescently labeled  
142 proteins, we have an almost instantaneous update of fluorophores close to the TOM-CC  
143 nanopores. This enables a spatiotemporal tracking of individual molecules with much higher  
144 accuracy and longer observation time up to a couple of minutes.

145 Upon TIRF illumination of membranes with 488 nm laser light, single TOM-CC molecules  
146 appeared as high-contrast fluorescent spots on a dark background (Fig. 2A). High ( $S_H$ ),  
147 intermediate ( $S_I$ ) and low ( $S_L$ ) intensity levels were indicating  $Ca^{2+}$ -flux through the TOM-CC in  
148 three distinct permeability states. No high-contrast fluorescent spots were observed in membranes  
149 without TOM-CC. The fact that the TOM-CC is a dimer with two identical  $\beta$ -barrel pores (Fig.  
150 1B) suggests that the high and intermediate intensity levels correspond to two conformational  
151 states ( $S_H$  and  $S_I$ ) with two pores and one pore open, respectively. The low intensity level may  
152 represent a conformation ( $S_L$ ) with both pores closed.

153  
154 Movie S1 shows an optical recording of the open-closed channel activity of several TOM-CCs  
155 over time. Individual image frames of membranes were recorded at high frequency at a frame rate  
156 of  $47.5\text{ s}^{-1}$  and corrected for fluorescence bleaching. The position and amplitude of individual  
157 spots were determined by fitting their intensity profiles to a two-dimensional symmetric Gaussian  
158 function with planar tilt to account for possible local illumination gradients in the bleaching  
159 corrected background (Fig. 2B and Movie S2). The time evolution of amplitude signals (Fig. 2C  
160 and Movie S2) shows that the TOM-CC does not occupy only one of the permeability states  $S_H$ ,  
161  $S_I$  and  $S_L$ , but can switch between these three permeability states over time (Fig. 2D). Additional  
162 examples are shown in Fig. S1. These data allow us to conclude that the fluctuations between the  
163 three defined permeability states are an inherent property of TOM-CC.

164  
165 To rule out the possibility that the observed intensity fluctuations are caused by possible  
166 thermodynamical membrane undulations in the evanescent TIRF illumination field (Duncan et  
167 al., 2017), or by local variations in  $Ca^{2+}$  flux from *cis* to *trans* (Wang et al., 2018; Yuqin Wang et  
168 al., 2019), we visualized the ion flux through a three-pore  $\beta$ -barrel which is almost entirely  
169 embedded in the lipid bilayer (Figs. S2A and S2B). In a series of control experiments, we  
170 reconstituted *E. coli* OmpF (Benz, 2006) into DIB membranes and observed virtually constant  
171 fluorescence intensities (Figs. 2E and 2F, and Figs. S2C - S2F). The protein did not exhibit any  
172 gating transitions between its four different permeability states (one to three pores open, all pores  
173 closed) (Benz, 2006), which normally require voltage to induce closure. The toggling of the TOM-  
174 CC between the three different permeability states  $S_H$ ,  $S_I$  and  $S_L$  (Fig. 2C) therefore had to have  
175 another cause.

### 176 177 **The permeability states of TOM-CC are coupled to lateral mobility**

178 Since the functions of many integral membrane proteins depend on their local position and state  
179 of movement in the membrane (Davis et al., 2021; Fujiwara et al., 2016; Jacobson et al., 2019;  
180 Koppel et al., 1981), we attempted to capture individual TOM-CCs in one of the permeability  
181 states  $S_H$ ,  $S_I$  or  $S_L$ . To this end, we simultaneously tracked the open-closed activity and position  
182 of individual TOM-CC molecules in the membrane over time using the same experimental  
183 conditions as described above. A scheme of the experiment is shown in Fig. 3A.

184  
185 Movie S3 and Fig. 3B clearly show that the open-closed channel activity of single TOM-CCs is  
186 coupled to lateral movement in the membrane. This is supported by comparison of the trajectories  
187 of single TOM-CC molecules with their corresponding fluorescence amplitude traces (Figs. 3C  
188 and 3D). The position of fluorescent spots does not change when TOM-CC is in intermediate  $S_I$   
189 or low  $S_L$  permeability state. Although weak intensity profiles do not allow accurate determination  
190 of the position of TOM-CC in the membrane plane, Movie S3 and Fig. 3D clearly show that TOM-  
191 CC does not move in  $S_L$ ; disappearance and reappearance of the fluorescent spot, switching from  
192  $S_I$  to  $S_L$  and back to  $S_I$ , occurs at virtually the same spatial x,y-coordinates. In contrast, the  
193 trajectories of TOM-CC in  $S_H$  state demonstrate free diffusion. Additional samples of trajectories  
194 and amplitude traces are shown in Fig. S1.

195 Similar *stop-and-go* movement patterns were observed in an independent set of experiments for  
196 TOM-CC covalently labeled with fluorescent dye Cy3 (Movie S4 and Fig. S3). It is particularly  
197 striking that freely moving TOM-CC molecules stop at the same spatial x,y-position when they  
198 cross the same position a second time, indicating a specific molecular trap or anchor point at this  
199 stop-position below the membrane. OmpF, however, used as a control, shows the most elementary  
200 mode of mobility expected for homogeneous membranes: simple Brownian translational diffusion  
201 (Movie S5 and Fig. S2). Since OmpF is almost entirely embedded in the membrane, there seems  
202 to be no coupling between channel activity and lateral protein diffusion.

203  
204 In good agreement with these results, the diffusion coefficients of the TOM-CC, evaluated from  
205 the activity profiles and trajectories (Fig. 3 and Fig. S1), were determined from time-averaged  
206 mean squared displacements as  $D_I = D_L \leq D_{\min} = 0.01 \mu\text{m}^2\text{s}^{-1}$  and  $D_H \approx 0.85 \pm 0.16$  (*mean*  $\pm$  *SEM*,  
207  $n = 46$ ) in states  $S_I$  and  $S_H$ , respectively. TOM-CC molecules, that revealed a diffusion constant  
208 less or equal than  $D_{\min}$ , were defined as immobilized. The diffusion coefficient  $D_H$  corresponds to  
209 typical values of Tom40 ( $D_{\text{Tom40}} \sim 0.5 \mu\text{m}^2 \text{s}^{-1}$ ) and Tom7 ( $D_{\text{Tom7}} \sim 0.7 \mu\text{m}^2 \text{s}^{-1}$ ) in native  
210 mitochondrial membranes (Kuzmenko et al., 2011; Sukhorukov et al., 2010) and is comparable  
211 to that of transmembrane proteins in plasma membranes lined by cytoskeletal networks (39, 43).  
212 The diffusion coefficient of TOM-CC in  $S_L$  state could not always be reliably determined here  
213 due to its extremely low intensity levels (see Materials and Methods).

214  
215 TOM-CC labeled with Cy3 yielded diffusion constants of  $D_{\text{Cy3,H}} \approx 0.36 \pm 0.08 \mu\text{m}^2 \text{s}^{-1}$  (*mean*  $\pm$   
216 *SEM*,  $n = 15$ ) and  $D_{\text{Cy3,I}} \leq D_{\min} = 0.01 \mu\text{m}^2\text{s}^{-1}$  for moving and transiently trapped particles,  
217 respectively (Fig. S3). In line with typical values for protein in homogenous lipid membranes  
218 (Koppel et al., 1981; Ramadurai et al., 2009), the lateral diffusion coefficient of the control protein  
219 OmpF was determined as  $D_{\text{OmpF}} \approx 1.16 \pm 0.07 \mu\text{m}^2 \text{s}^{-1}$  (*mean*  $\pm$  *SEM*,  $n = 42$ ) (Fig. S2).

220  
221 Based on these results we conclude that transient arrest of TOM-CC in a lipid bilayer membrane,  
222 caused by interaction with the supporting hydrogel, triggers the closure of its two  $\beta$ -barrel pores.  
223 Since retarded diffusion of membrane proteins is largely the result of cluster formation of proteins  
224 near membrane surfaces (Nawrocki et al., 2019), this phenomenon is important for studying  
225 preprotein trapping at either Tom40  $\beta$ -barrel when TOM-CC interacts with proteins at the  
226 periphery of the outer membrane.

### 227 **Controlled immobilization of the TOM-CC results in channel closures**

228 Because the two Tom22 subunits in the middle of the TOM-CC clearly protrude from the  
229 membrane plane at their IMS side (Fig. 1B) (Araiso et al., 2019; Bausewein et al., 2017; Tucker  
230 and Park, 2019; Wang et al., 2020), we hypothesized that Tom22 functions as a “light-switch”  
231 and determines the lateral mobility of the TOM-CC and thus the transitions between open ( $S_H$ )  
232 and the closed ( $S_I$  and  $S_L$ ) conformations of the two TOM-CC pores.

233  
234 To test this hypothesis, we replaced the non-modified agarose hydrogel with Ni-NTA-modified  
235 agarose to further restrict lateral movement of the protein by permanently tethering individual  
236 TOM-CC molecules via the C-terminus of histidine-labeled Tom22 to the hydrogel (Fig. 4A).

237  
238 In good agreement with the observation that transient closure of the two Tom40  $\beta$ -barrels  
239 accompanies transient arrest of the TOM-CC (Figs. 3C and 3D), permanently immobilized TOM-  
240 CC ( $D_{I,L} \leq D_{\min} = 0.01 \mu\text{m}^2 \text{s}^{-1}$ ,  $n = 83$ ) was most often found in states  $S_I$  or  $S_L$ , indicating one or  
241 two pores closed, respectively (Movie S6 and Fig. 4B, Fig. S4A - S4D). TOM-CC molecules that  
242 were not immobilized by the binding of Tom22 to Ni-NTA moved randomly in the membrane  
243 plane ( $D_H \approx 0.34 \pm 0.06 \mu\text{m}^2 \text{s}^{-1}$ , *mean*  $\pm$  *SEM*,  $n = 40$ ). As expected, movement was interrupted  
244



occasionally by periods of transient arrest ( $D_{I,L} \leq D_{\min}$ ). Again, moving TOM-CC molecules were found in the fully open  $S_H$  state; non-moving complexes in the  $S_I$  or the  $S_L$  states (Fig. 4C; Figs. S4E - S4H). In the presence of imidazole, which prevents tight binding of histidine-tagged Tom22 to Ni-NTA-modified agarose, virtually no permanently immobilized TOM-CC molecules were observed ( $D_H \approx 1.35 \pm 0.14 \mu\text{m}^2 \text{s}^{-1}$ , *mean*  $\pm$  *SEM*,  $n = 15$ ).

### Correlation between lateral motion and TOM-CC channel activity

DIB membranes supported by both hydrogels, non-modified and Ni-NTA-modified agarose (Movie S6), showed a statistically significant number of single TOM-CC molecules that were either non-diffusive  $D_{H,I} \leq D_{\min}$  or diffusive  $D_H > D_{\min}$  at  $S_I$  and  $S_H$ . Thus, TOM-CC molecules were numerically sorted into diffusive and permanently tethered groups by  $D_H$  and  $D_I$  to emphasize the correlation between the mode of lateral diffusion and channel activity of 187 observed TOM-CC molecules (Fig. 5A). We can generally define three different classes of lateral motion and channel activity. The first and major class (I) shows lateral mobility at  $S_H$  only, while being tethered at  $S_I$  ( $D_H > D_{\min}$  and  $D_I \leq D_{\min}$ ). The second class (II) shows similar diffusivities ( $D_{H,I} > D_{\min}$ , Fig. S5) at both states,  $S_H$  and  $S_I$ . The TOM molecules of this class probably do not have functional Tom22 (Ahting et al., 2001; Shiota et al., 2015) and thus do not interact with the hydrogel. Another possible but unlikely explanation is a spatial void of agarose network preventing mechanoregulated interaction of Tom22 with the network within the observation time window. The third class (III) represents permanently tethered TOM-CC molecules, which are exclusively non-diffusive ( $D_{H,I} \leq D_{\min}$ ). Most molecules of that class are in  $S_I$  and  $S_L$  (Figs. S4A and S4B). Those TOM-CC molecules, which briefly change from  $S_I$  to  $S_H$  and back to  $S_I$  (Figs. S4C and S4D), might become diffusive but are immediately recaptured and trapped again by the hydrogel below the membrane.

Fig. 5B shows state probabilities of TOM-CC in membranes supported by the two different hydrogels, non-modified and Ni-NTA-modified agarose. Diffusive molecules ( $D_H > D_{\min}$ ) in membranes supported both by non-modified and Ni-NTA-modified agarose show similar probabilities to be at one of the three permeability states ( $S_H$ ,  $S_I$  and  $S_L$ ). Diffusive TOM-CC molecules are significantly more often at  $S_H$  than at  $S_I$  and  $S_L$ . The permanently tethered fraction of TOM-CC (67%) in Ni-NTA-modified agarose is  $\sim 2.4$  times larger compared to the fraction (28%) in non-modified agarose, consistent with the stronger interaction of Tom22 with the hydrogel, thereby permanently constraining lateral motion. In line with this, permanently tethered molecules ( $D_{H,I} \leq D_{\min}$ ) in both hydrogel-supported membranes stay at  $S_I$  during the majority of time, and show only transient  $S_H$  and  $S_L$  occupancy. The data suggest that the C-terminal IMS domain of Tom22 (Fig. 1B) plays a previously unrecognized role in mechanoregulation of TOM-CC channel activity by binding to immobile structures near the membrane.

Although diffusive TOM-CC molecules ( $D_H > D_{\min}$ ) are observed more often at  $S_H$  in Ni-NTA-modified agarose than in non-modified agarose supported membranes (Fig. 5B), they show a lower stability at  $S_H$  having a significantly higher transition probability for switching between  $S_H$  and  $S_I$  (Fig. 5C, ( $S_H \rightleftharpoons S_I$ )  $\approx 5.3\%$  versus ( $S_H \rightleftharpoons S_I$ )  $\approx 2.3\%$ ). This is in line with the higher efficacy of TOM-CC-trapping by Ni-NTA-modified agarose compared to non-modified agarose. In contrast to non-modified hydrogel, Ni-NTA-modified agarose hydrogel can capture freely mobile TOM-CC via the IMS domain of Tom22 in two ways: by specific interaction and permanent anchorage with Ni-NTA and by nonspecific collision and transient anchorage. While a direct transition between  $S_H$  and  $S_L$  barely occurs in both systems, transitions between  $S_I$  and  $S_L$  are similarly often. This indicates that the two Tom40  $\beta$ -barrel pores independently open and close within the time resolution ( $\sim 20$  ms) of our experiment.

## 295 Discussion

296  
297 TOM-CC is usually considered as a passive conduit for mitochondrial preproteins and small  
298 molecules across the outer mitochondrial membrane, which is regulated by interactions with other  
299 proteins and posttranslational modifications (Rapaport et al., 1998; Schmidt et al., 2011).

300  
301 In this study, we have shown for the first time that lateral diffusion of isolated TOM-CC in the  
302 plane of the membrane is coupled to transmembrane channel activity. Conversely, restriction of  
303 the lateral mobility of the complex by the surrounding matrix influences channel activity in a  
304 defined manner. This in turn indicates that TOM-CC does not only respond to biochemical  
305 (Rapaport et al., 1998; Schmidt et al., 2011), but also to yet-unknown mechanical stimuli:  
306 anchorage of freely moving TOM-CC to structures near the membrane leads to TOM-CC channel  
307 closing.

308  
309 Our conclusions are based upon data obtained from single molecules, which yield insights into  
310 molecular events that are difficult to obtain *in vivo* and in bulk methods. Typically, single  
311 molecule methods are often subject to statistical uncertainties arising from the limited amount of  
312 measurements, which are technically feasible. For this reason, we have obtained data from  $n =$   
313 187 single molecules and over half a million image frames (Fig. 5A,  $N = 532,576$ ). This sampling  
314 number allows us to assign molecular events with statistical confidence using non-parametric  
315 statistics, but even a visual perusal of the data is sufficient to allow a first assessment of data  
316 reliability. Our data indicate three molecular states of the TOM-CC, for which the simplest model  
317 is a dimeric pore structure with one or two pores open and all pores closed. As indicated above,  
318 the state transitions are responding to interaction with the supporting agarose matrix. We believe  
319 this mechanoregulated interactive effect, as we observed, is of physiological relevance.

320  
321 Previous super-resolution fluorescence and immuno-electron microscopy studies have revealed a  
322 dynamic submitochondrial distribution of the protein translocation machineries TOM and TIM23  
323 in the outer and inner membrane of mitochondria, both of which depend on the physiological state  
324 of the cell (Palmer et al., 2021; Vogel et al., 2006; Wurm et al., 2011). An attractive possibility  
325 would be that interaction of the TOM complex with subunits of TIM23 in the mitochondrial  
326 intermembrane space (IMS) *via* their subunits Tom22 and Tim50, respectively, might be  
327 coordinated so that protein import through the TOM channels can only occur when TIM23 is  
328 locally available (Callegari et al., 2020; Chacinska et al., 2005; Mokranjac et al., 2009; van der  
329 Laan et al., 2006). Thus, in the light of transient cooperation between TOM and TIM23 (Donzeau  
330 et al., 2000; Gevorkyan-Airapetov et al., 2009; Waegemann et al., 2015) it is becoming  
331 increasingly clear that the interplay between lateral diffusion and channel activity of these  
332 complexes is pivotal for protein translocation into mitochondria.

333  
334 However, previous studies beg a fundamental question: are the two Tom40 channels open  
335 continually, as seems to be the case from the static cryoEM structures (Fig. 1B; (Araiso et al.,  
336 2019; Bausewein et al., 2017; Tucker and Park, 2019; Wang et al., 2020), or can the protein  
337 channels be actively influenced by interaction with exogenous, interacting proteins? Previous  
338 studies reported that TOM complex channels from wild-type yeast mitochondria were mainly in  
339 the closed state (van Wilpe et al., 1999). However, TOM isolated from mitochondria lacking  
340 Tom22 was mainly in the open state (van Wilpe et al., 1999).

341  
342 In our study, we have demonstrated that Tom22 plays an important role in the kinetics of TOM-  
343 CC channel activation. Examination of the cryoEM structure of *N. crassa* TOM-CC (Fig. 1B,  
344 (Bausewein et al., 2020, 2017)) shows that its two Tom22 subunits extend significantly into the

345 IMS space, thereby preventing a direct interaction of the Tom40  $\beta$ -barrels with the agarose matrix.  
346 It is therefore likely that only the two Tom22 subunits are primarily responsible for the matrix-  
347 dependent mechanoregulated channel closing activity. First, this hypothesis is supported by our  
348 observation that His-tagged Tom22, when tightly bound by Ni-NTA-agarose, triggers channel  
349 closing (Movie S6). Secondly, the cryoEM structure of TOM-CC reveals that the dimer interface  
350 of the Tom40 barrels is extremely limited, with only nine amino acid residues contributing to the  
351 interface at the cytosolic side of the barrel (Araiso et al., 2019; Bausewein et al., 2020, 2017;  
352 Tucker and Park, 2019; Wang et al., 2020). At the IMS side of the barrel, two conserved lysine  
353 residues (Tom40-K298, contributed from each *Nc. crassa* Tom40 monomer) seem to be close  
354 enough to severely destabilize the dimer. In fact, most of the stabilizing interactions of the Tom40  
355 dimer seem to be contributed by residues from the interacting, transmembrane  $\alpha$ -helices of Tom22  
356 and a lipid phosphate group (Araiso et al., 2019; Bausewein et al., 2020; Tucker and Park, 2019).  
357 Thus, it seems reasonable that the conformation of the Tom40 barrel dimer is essentially  
358 determined by the positioning of two Tom22 subunits. Taken together, it is tempting to suggest  
359 that, in our experiments, when the intermembrane space (IMS)-located polar domains of the  
360 Tom22 subunits (which extend more than 22Å into the IMS, Fig. 1B) interact with the matrix of  
361 the agarose gel, the Tom22 subunits force the Tom40 dimer interface to experience a  
362 conformational change resulting in channel closure.

363  
364 From a mechanistic point of view, this might be caused by classic rigid body rotation at the Tom40  
365 dimeric interface, perpendicular to the membrane normal. Rigid body rotation at subunit interfaces  
366 is a common feature of quaternary conformational changes in oligomeric proteins, for which the  
367 archetypical paradigm is rotation of the  $\alpha_1\beta_1-\alpha_2\beta_2$  interface of hemoglobin during the oxy-deoxy  
368 allosteric transition (Baldwin and Chothia, 1979). The Tom40 dimer rigid body rotation might  
369 allow the disordered 84 amino acid residues, cytosolically located N-terminal domain of the  
370 Tom22 subunit, which is not visible in the cryoEM structures, to “fall into” the Tom40 channel,  
371 thereby blocking  $\text{Ca}^{2+}$  export in the TIRF experiment. *In vivo*, this conformational change might  
372 be caused by tethering the IMS domain of Tom22 to Tim50 of the TIM23 machinery, which is  
373 virtually immobile in the mitochondrial inner boundary membrane ( $D_{\text{Tim23}} \approx 0.04 \mu\text{m}^2\text{s}^{-1}$ )  
374 (Albrecht et al., 2006; Appelhans and Busch, 2017; Callegari et al., 2020; Chacinska et al., 2005;  
375 Mokranjac et al., 2009; van der Laan et al., 2006).

376  
377 Previous studies suggested that a dimeric Tom22-free form of Tom40 dynamically exchanges  
378 with a trimeric TOM complex in outer mitochondrial membranes (Araiso et al., 2019; Shiota et  
379 al., 2015). In this study, we have not explicitly considered the functional relevance of TOM  
380 trimers. First, all of the cryoEM data obtained for detergent-solubilized TOM-CCs published so  
381 far (Araiso et al., 2019; Bausewein et al., 2017; Tucker and Park, 2019; Wang et al., 2020),  
382 indicates the dimer as the major subunit form. Secondly, we do not require a trimer to interpret  
383 the channel activity observed here. In fact, the functional trimer would require a fourth channel  
384 state, which has rarely been observed. Finally, the formation of trimers from functional dimers  
385 seems to be at variance with well-known principles of protein symmetry at subunit interfaces.  
386 Therefore, in lieu of more biophysical data from defined systems, we presently do consider the  
387 dimer and not the trimer of Tom40 to be the major functional form of the TOM-CC.

388  
389 While eukaryotic secretion systems allow passage through a single bilayer, proteins that enter  
390 organelles of endosymbiotic origin must pass through two bilayers and translocation machineries  
391 to reach the interior of the organelle (Davis et al., 2021). Thus, future approaches should consider  
392 the multiprotein nature of the TOM-TIM import system, and how this additional layer of  
393 complexity is affected by the role of mechanoregulation in native mitochondrial membranes with  
394 TOM subunits Tom20 and Tom70 in the presence of mitochondrial preproteins (Wiedemann and



Pfanner, 2017). However, since Tom20 and Tom70 do not have appreciable IMS domains and both proteins are only loosely bound to the complex (Ahting et al., 1999; Wiedemann and Pfanner, 2017), it seems unlikely that these proteins significantly influence the interplay between lateral diffusion and channel kinetics of the TOM-CC. The diffusion coefficient of mobile TOM-CC shown in our work is in good agreement to that of mobile Tom40 in native mitochondria (Kuzmenko et al., 2011; Sukhorukov et al., 2010). We therefore propose that the *stop-and-go* concept described here also applies to native mitochondria, in which proteins can freely move only on smaller length scales. TOM-CC channels may simply be trapped more frequently, leading to a higher frequency of open-closed transitions.

Recently, the now extensive structural and physical data common to mechanosensitive membrane proteins have been reviewed (Haswell et al., 2011; Jin et al., 2020; Kefauver et al., 2020). The structural data now allows mechanosensitive proteins (all of which were comprised of transmembrane  $\alpha$ -helices) to be separated into five different classes, each subject to characteristic underlying molecular mechanisms. They also show that for the membrane channels considered, fundamental physical properties of the membrane can influence channel activity. This ancient mechanism to regulate open-closed channel activity is also observed in mitochondria (Deng et al., 2020; Lee et al., 2016; Li et al., 2020; Walewska et al., 2018).

Mechanosensitivity *via* force transmission from a tether to the extracellular matrix and/or the cytoskeleton has been established for a number of  $\alpha$ -helical membrane proteins (Brohawn et al., 2014a, 2014b; Ge et al., 2018; Jin et al., 2020; Kefauver et al., 2020; Martinac, 2004; Pliotas and Naismith, 2017; Teng et al., 2015; Yang Wang et al., 2019). These findings go along with our observations for the TOM-CC, which seems to obey the “tether model” proposed by Kefauver et al. (2020) (Kefauver et al., 2020), where an intermembrane protein anchor domain limits lateral diffusion. To our knowledge, the TOM-CC complex would thus be the only example so far, of a membrane  $\beta$ -barrel protein, which exhibits membrane state-dependent mechanosensitive-like properties.

## Materials and Methods

### **Growth of *Neurospora crassa* and preparation of mitochondria**

*Neurospora crassa* (strain GR-107) that contains a hexahistidinyl-tagged form of Tom22 was grown and mitochondria were isolated as described (Künkele et al., 1998). Briefly, ~1.5 kg (wet weight) of hyphae were homogenized in 250 mM sucrose, 2 mM EDTA, 20 mM Tris pH 8.5, 1 mM phenylmethylsulfonyl fluoride (PMSF) in a Waring blender at 4°C. ~1.5 kg of quartz sand was added and the cell walls were disrupted by passing the suspension through a corundum stone mill. Cellular residues were pelleted and discarded in two centrifugation steps (4,000 x g) for 5 min at 4°C. The mitochondria were sedimented in 250 mM sucrose, 2 mM EDTA, 20 mM Tris pH 8.5, 1 mM PMSF at 17,000 x g for 80 min. This step was repeated to improve the purity. The isolated mitochondria were suspended in 250 mM sucrose, 20 mM Tris pH 8.5, 1 mM PMSF at a final protein concentration of 50 mg ml<sup>-1</sup>, shock-frozen in liquid nitrogen and stored at -20°C.

### **Isolation of TOM core complex**

TOM-CC, containing subunits Tom40, Tom22, Tom7, Tom6 and Tom5, were purified from *Neurospora crassa* strain GR-107 as described (Bausewein et al., 2017). *N. crassa* mitochondria were solubilized at a protein concentration of 10 mg/ml in 1% (w/v) n-dodecyl- $\beta$ -D-maltoside (Glycon Biochemicals, Germany), 20% (v/v) glycerol, 300 mM NaCl, 20 mM imidazole, 20 mM Tris-HCl (pH 8.5), and 1 mM PMSF. After centrifugation at 130,000 x g, the clarified extract was

445 loaded onto a nickel-nitrilotriacetic acid column (Cytiva, Germany). The column was rinsed with  
446 the same buffer containing 0.1% (w/v) n-dodecyl- $\beta$ -D-maltoside and TOM core complex was  
447 eluted with buffer containing 0.1% (w/v) n-dodecyl- $\beta$ -D-maltoside, 10 % (w/v) glycerol, 20 mM  
448 Tris (pH 8.5), 1 mM PMSF, and 300 mM imidazole. For further purification, TOM core complex  
449 containing fractions were pooled and loaded onto a Resource Q anion exchange column (Cytiva)  
450 equilibrated with 20 mM Hepes (pH 7.2), 2% (v/v) dimethyl sulfoxide and 0.1 % (w/v) n-dodecyl-  
451  $\beta$ -D-maltoside. TOM core complex was eluted with 0 – 500 mM KCl. A few preparations  
452 contained additional phosphate (~0.19 mM). The purity of protein samples (0.4 – 1.2 mg/ml) was  
453 assessed by sodium dodecyl sulfate polyacrylamide gel electrophoresis (SDS-PAGE) followed by  
454 staining with Coomassie Brilliant Blue.

### 455 **Fluorescence labeling of TOM core complex**

456 TOM-CC was covalently labeled with the fluorescent dye Cy3 according to (Joo and Ha, 2008).  
457 Briefly, about 1 mg/ml of purified TOM-CC was reacted with Cy3-maleimide (AAT Bioquest,  
458 USA) at a molar ratio complex to dye of 1:5 in 20 mM HEPES (pH 7.2), 2 % (v/v) dimethyl  
459 sulfoxide, 350 mM KCl and 0.1 % (w/v) n-dodecyl- $\beta$ -D-maltoside at 25 °C for 2 h in the dark.  
460 Labeled protein was separated from unconjugated dye by affinity chromatography using Ni-NTA  
461 resin, subjected to SDS-PAGE and visualized by 555 nm light and Coomassie Brilliant Blue  
462 staining.  
463

### 464 **Isolation of OmpF**

465 Native OmpF protein was purified from *Escherichia coli* strain BE BL21(DE3)omp6, lacking  
466 both LamB and OmpC as described (Bieligmeyer et al., 2016). Cells from 1 L culture were  
467 suspended in 50 mM Tris-HCl, pH 7.5 buffer containing 2 mM MgCl<sub>2</sub> and DNase and broken by  
468 passing through a French press. Unbroken cells were removed by a low-speed centrifugation,  
469 then, the supernatant was centrifuged at 100,000 x g for 1 h. The pellet was resuspended in 50  
470 mM Tris-HCl, pH 7.5, and mixed with an equal volume of SDS buffer containing 4 % (w/v)  
471 sodium dodecyl sulfate (SDS), 2 mM  $\beta$ -mercaptoethanol and 50 mM Tris-HCl, pH 7.5. After 30  
472 min incubation at a temperature of 50 °C, the solution was centrifuged at 100,000 x g for 1 h. The  
473 pellet was suspended in 2 % (w/v) SDS, 0.5 M NaCl, 50 mM Tris-HCl, pH 7.5, incubated at a  
474 temperature of 37 °C for 30 min and centrifuged again at 100,000 x g for 30 min. The supernatant  
475 containing OmpF was dialyzed overnight against 20 mM Tris, pH 8, 1 mM EDTA and 1 % (w/v)  
476 n-octyl polyoxyethylene (Octyl-POE, Bachem, Switzerland). The purity of the protein was  
477 assessed by SDS-PAGE.  
478

### 479 **Formation of droplet interface bilayers**

480 Droplet interface bilayer (DIB) membranes were prepared as previously described (Huang et al.,  
481 2015; Leptihn et al., 2013; Wang et al., 2018; Yuqin Wang et al., 2019) with minor modifications.  
482 Glass coverslips were washed in an ultrasonic bath with acetone. Then the coverslips were rinsed  
483 several times with deionized water and dried under a stream of nitrogen. Subsequently, the glass  
484 coverslips were subjected to plasma cleaning for 5 min. 140  $\mu$ l of molten 0.75% (w/v) low melting  
485 non-modified agarose ( $T_m < 65^\circ\text{C}$ , Sigma-Aldrich) or alternatively low melting Ni-NTA-modified  
486 agarose (Cube Biotech, Germany) was spin-coated at 5,000 rpm for 30 s onto the plasma-cleaned  
487 side of a glass coverslip. After assembly of the coverslip in a custom-built DIB device, the  
488 hydrogel film was hydrated with 2.5 % (w/v) low melting agarose, 0.66 M CaCl<sub>2</sub> and 8.8 mM  
489 HEPES (pH 7.2) or with 2.5 % (w/v) low melting agarose, 0.66 M CaCl<sub>2</sub>, 300 mM imidazole and  
490 8.8 mM HEPES (pH 7.2) and covered with a lipid/oil solution containing 9.5 mg/ml 1,2-  
491 diphytanoyl-sn-glycero-3-phosphocholine (DPhPC, Avanti Polar Lipids, USA) and 1:1 (v:v)  
492 mixture oil of hexadecane (Sigma-Aldrich) and silicon oil (Sigma-Aldrich). Aqueous droplets  
493 (~200 nl) containing 7  $\mu$ M Fluo-8 sodium salt with a maximum excitation wavelength of 495 nm  
494

(Santa Cruz Biotechnology, USA), 400  $\mu\text{M}$  EDTA, 8.8 mM HEPES (pH 7.2), 1.32 M KCl,  $\sim 2.7$  nM TOM core complex or  $\sim 2$  nM OmpF were pipetted into the same lipid/oil solution in a separate tray using a Nanoliter 2000 injector (World Precision Instruments, Sarasota, USA). After 2 hours of equilibration at room temperature, the droplets were transferred into the custom-built DIB device to form stable lipid bilayers between the droplet and the agarose hydrogel.

### TIRF microscopy and optical recording

An inverted total internal reflection fluorescence microscope (Ti-E Nikon) was used to image DIB membranes under TIRF illumination using a 488 nm laser (Visitron). Fluorescent emission of Fluo-8, transmitted through a Quad-Band TIRF-Filter (446/523/600/677 HC, AHF), was collected through a 100 x oil objective lens (Apochromat N.A. 1.49, Nikon) and recorded by a back-illuminated electron-multiplying CCD camera (iXon Ultra 897,  $512 \times 512$  pixels, Andor) for 1 min at a frame rate of  $47.51 \text{ s}^{-1}$ . The pixel size was  $0.16 \mu\text{m}$ .

### Tracking of fluorescence spots

For reliable tracking and analysis of the spatiotemporal dynamics of individual fluorescence TOM-CC channel activity a customized fully automated analysis routine was implemented in Matlab (The Mathworks, USA). The effect of bleaching was corrected by considering a double exponential decay obtained by least square fitting of the image series. No filter algorithm was applied. The initial spatial position of a fluorescence spot was manually selected and within a defined region of interested (ROI,  $30 \times 30$  pixels) fitted to a two-dimensional symmetric Gaussian function with planar tilt that accounts for possible local illumination gradients, as follows

$$G_{2D}(\mathbf{x}, \boldsymbol{\mu}, p_k) = p_1 + p_{2,3}(\mathbf{x} - \boldsymbol{\mu}) + A \exp\left(-(\mathbf{x} - \boldsymbol{\mu})^2 / 2\sigma^2\right)$$

where  $\mathbf{x} = (x, y)$  is the ROI with the fluorescence intensity information,  $A$  and  $\sigma$  are the amplitude and width of the Gaussian,  $p_k$  are parameters that characterize the background intensity of the ROI, and  $\boldsymbol{\mu} = (x_0, y_0)$  defines the position of the Gaussian. The latter was used to update the position of ROI for the next image. Spots that temporal fuse their fluorescence signal with closely located spots were not considered due to the risk of confusing those spots.

### Data analysis

The extracted amplitudes were separated by two individually selected amplitude-thresholds that divided the three states of activity ( $S_H$ ,  $S_I$  and  $S_L$ ). The lateral diffusion constants  $D_H$  and  $D_I$  were obtained individually for spots within the respective high and intermediate amplitude range by linear regression of the time delay  $\tau$  and the mean square displacement of the spots. Further details may be found in SI Experimental Methods. As

$$D = \frac{\left\langle \left| \mathbf{r}(x, y, \tau) - \mathbf{r}(x_0, y_0, \tau) \right|^2 \right\rangle}{4\tau}$$

The largest time delay  $\tau_{\text{max}} = 0.5 \text{ s}$  was iteratively decreased to suffice the coefficient of determination  $R^2 \geq 0.9$  for avoiding the influence of sub-diffusion or insufficient amount of data. This followed the general approach of a Brownian particle in two-dimensions. The diffusions less than  $D_{\text{min}} = 0.01 \mu\text{m}^2 \text{ s}^{-1}$  are defined as non-diffusive considering the spatiotemporal limitations of the experimental setup and resolution of the fitted two-dimensional Gaussian function, since most led to  $R^2 \ll 0.9$ . The calculation of the mean  $\mu$  and standard deviation  $\sigma$  of the diffusion constant was done using the log-transformation due to its skewed normal distribution, as

$$\mu_{\log} = \frac{1}{N} \sum_{i=1}^N \log(D_i)$$

and

$$\sigma_{\log} = \sqrt{\frac{1}{N} \sum_{i=1}^N (\log(D_i) - \mu_{\log})^2}$$

where  $N$  is the number of diffusion constants obtained for one experimental condition. The back-transformation was calculated then as

$$\mu = \exp(\mu_{\log} + 0.5 \cdot \sigma_{\log}^2)$$

And

$$\sigma = \sqrt{\mu^2 (\exp(\sigma_{\log}^2) - 1)}$$

respectively, following the Finney estimator approach (Finney, 1941). The standard error of mean (*SEM*) considering a confidence interval of 95% was calculated as

$$SEM = \frac{1.96\sigma}{\sqrt{N}}$$

## References

- Ahting U, Thieffry M, Engelhardt H, Hegerl R, Neupert W, Nussberger S. 2001. Tom40, the pore-forming component of the protein-conducting TOM channel in the outer membrane of mitochondria. *J Cell Biol* **153**:1151–1160. doi:10.1083/jcb.153.6.1151
- Ahting U, Thun C, Hegerl R, Typke D, Nargang FE, Neupert W, Nussberger S. 1999. The TOM core complex: the general protein import pore of the outer membrane of mitochondria. *J Cell Biol* **147**:959–968. doi:10.1083/jcb.147.5.959.
- Albrecht R, Rehling P, Chacinska A, Brix J, Cadamuro SA, Volkmer R, Guiard B, Pfanner N, Zeth K. 2006. The Tim21 binding domain connects the preprotein translocases of both mitochondrial membranes. *EMBO Rep* **7**:1233–1238. doi:10.1038/sj.embor.7400828
- Appelhans T, Busch KB. 2017. Dynamic imaging of mitochondrial membrane proteins in specific sub-organelle membrane locations. *Biophys Rev* **9**:345–352. doi:10.1007/s12551-017-0287-1
- Araiso Y, Tsutsumi A, Qiu J, Imai K, Shiota T, Song J, Lindau C, Wenz L-S, Sakaue H, Yunoki K, Kawano S, Suzuki J, Wischniewski M, Schütze C, Ariyama H, Ando T, Becker T, Lithgow T, Wiedemann N, Pfanner N, Kikkawa M, Endo T. 2019. Structure of the mitochondrial import gate reveals distinct preprotein paths. *Nature* **575**:395–401. doi:10.1038/s41586-019-1680-7
- Baldwin J, Chothia C. 1979. Haemoglobin: the structural changes related to ligand binding and its allosteric mechanism. *J Mol Biol* **129**:175–220. doi:10.1016/0022-2836(79)90277-8
- Bausewein T, Mills DJ, Langer JD, Nitschke B, Nussberger S, Kühlbrandt W. 2017. Cryo-EM structure of the TOM core complex from *Neurospora crassa*. *Cell* **170**:693–700. doi:10.1016/j.cell.2017.07.012
- Bausewein T, Naveed H, Liang J, Nussberger S. 2020. The structure of the TOM core complex in the mitochondrial outer membrane. *Biol Chem* **401**:687–697. doi:10.1515/hsz-2020-0104



- 587 Becker L, Bannwarth M, Meisinger C, Hill K, Model K, Krimmer T, Casadio R, Truscott KN, Schulz  
588 GE, Pfanner N, Wagner R. 2005. Preprotein translocase of the outer mitochondrial membrane:  
589 reconstituted Tom40 forms a characteristic TOM Pore. *J Mol Biol* **353**:1011–1020.  
590 doi:10.1016/j.jmb.2005.09.019
- 591 Becker T, Song J, Pfanner N. 2019. Versatility of preprotein transfer from the cytosol to mitochondria.  
592 *Trends Cell Biol* **29**:534–548. doi:10.1016/j.tcb.2019.03.007
- 593 Benz R. 2006. Bacterial and Eukaryotic Porins: Structure, Function, Mechanism. John Wiley & Sons.
- 594 Benz R, Kottke M, Brdiczka D. 1990. The cationically selective state of the mitochondrial outer  
595 membrane pore: a study with intact mitochondria and reconstituted mitochondrial porin. *Biochim*  
596 *Biophys Acta - Biomembr* **1022**:311–318. doi:10.1016/0005-2736(90)90279-W
- 597 Bieligmeyer M, Artukovic F, Nussberger S, Hirth T, Schiestel T, Müller M. 2016. Reconstitution of the  
598 membrane protein OmpF into biomimetic block copolymer–phospholipid hybrid membranes.  
599 *Beilstein J Nanotechnol* **7**:881–892. doi:10.3762/bjnano.7.80
- 600 Brohawn SG, Campbell EB, MacKinnon R. 2014a. Physical mechanism for gating and  
601 mechanosensitivity of the human TRAAK K<sup>+</sup> channel. *Nature* **516**:126–130.  
602 doi:10.1038/nature14013
- 603 Brohawn SG, Su Z, MacKinnon R. 2014b. Mechanosensitivity is mediated directly by the lipid membrane  
604 in TRAAK and TREK1 K<sup>+</sup> channels. *Proc Natl Acad Sci* **111**:3614–3619.  
605 doi:10.1073/pnas.1320768111
- 606 Callegari S, Cruz-Zaragoza LD, Rehling P. 2020. From TOM to the TIM23 complex – handing over of a  
607 precursor. *Biol Chem* **401**:709–721. doi:10.1515/hsz-2020-0101
- 608 Chacinska A, Lind M, Frazier AE, Dudek J, Meisinger C, Geissler A, Sickmann A, Meyer HE, Truscott  
609 KN, Guiard B, Pfanner N, Rehling P. 2005. Mitochondrial presequence translocase: switching  
610 between TOM tethering and motor recruitment involves Tim21 and Tim17. *Cell* **120**:817–829.  
611 doi:10.1016/j.cell.2005.01.011
- 612 Davis MM, Lamichhane R, Bruce BD. 2021. Elucidating protein translocon dynamics with single-  
613 molecule precision. *Trends Cell Biol* **31**:569–583. doi:10.1016/j.tcb.2021.03.009
- 614 Demuro A, Parker I. 2005. Optical patch-clamping: single-channel recording by imaging Ca<sup>2+</sup> flux  
615 through individual muscle acetylcholine receptor channels. *J Gen Physiol* **126**:179–192.  
616 doi:10.1085/jgp.200509331
- 617 Deng Z, Maksaev G, Schlegel AM, Zhang J, Rau M, Fitzpatrick JAJ, Haswell ES, Yuan P. 2020.  
618 Structural mechanism for gating of a eukaryotic mechanosensitive channel of small conductance.  
619 *Nat Commun* **11**:3690. doi:10.1038/s41467-020-17538-1
- 620 Donzeau M, Káldi K, Adam A, Paschen S, Wanner G, Guiard B, Bauer MF, Neupert W, Brunner M.  
621 2000. Tim23 links the inner and outer mitochondrial membranes. *Cell* **101**:401–412.  
622 doi:10.1016/S0092-8674(00)80850-8
- 623 Duncan AL, Reddy T, Koldsø H, Hélie J, Fowler PW, Chavent M, Sansom MSP. 2017. Protein crowding  
624 and lipid complexity influence the nanoscale dynamic organization of ion channels in cell  
625 membranes. *Sci Rep* **7**:16647. doi:10.1038/s41598-017-16865-6
- 626 Finney DJ. 1941. On the distribution of a variate whose logarithm is normally distributed. *Suppl J R Stat*  
627 *Soc* **7**:155–161. doi:10.2307/2983663
- 628 Fujiwara TK, Iwasawa K, Kalay Z, Tsunoyama TA, Watanabe Y, Umemura YM, Murakoshi H, Suzuki  
629 KGN, Nemoto YL, Morone N, Kusumi A. 2016. Confined diffusion of transmembrane proteins  
630 and lipids induced by the same actin meshwork lining the plasma membrane. *Mol Biol Cell*  
631 **27**:1101–1119. doi:10.1091/mbc.E15-04-0186
- 632 Ge J, Elferich J, Goehring A, Zhao H, Schuck P, Gouaux E. 2018. Structure of mouse protocadherin 15  
633 of the stereocilia tip link in complex with LHFPL5. *eLife* **7**:e38770. doi:10.7554/eLife.38770
- 634 Gevorkyan-Airapetov L, Zohary K, Popov-Čeleketić D, Mapa K, Hell K, Neupert W, Azem A,  
635 Mokranjac D. 2009. Interaction of Tim23 with Tim50 is essential for protein translocation by the  
636 mitochondrial TIM23 complex. *J Biol Chem* **284**:4865–4872. doi:10.1074/jbc.M807041200

- 637 Gold VA, Chroszicki P, Bragoszewski P, Chacinska A. 2017. Visualization of cytosolic ribosomes on the  
638 surface of mitochondria by electron cryo-tomography. *EMBO Rep* **18**:1786–1800.  
639 doi:10.15252/embr.201744261
- 640 Gold VAM, Ieva R, Walter A, Pfanner N, van der Laan M, Kühlbrandt W. 2014. Visualizing active  
641 membrane protein complexes by electron cryotomography. *Nat Commun* **5**:4129.  
642 doi:10.1038/ncomms5129
- 643 Haswell ES, Phillips R, Rees DC. 2011. Mechanosensitive Channels: What Can They Do and How Do  
644 They Do It? *Structure* **19**:1356–1369. doi:10.1016/j.str.2011.09.005
- 645 Hill K, Model K, Ryan MT, Dietmeier K, Martin F, Wagner R, Pfanner N. 1998. Tom40 forms the  
646 hydrophilic channel of the mitochondrial import pore for preproteins. *Nature* **395**:516–521.  
647 doi:10.1038/26780
- 648 Huang S, Romero-Ruiz M, Castell OK, Bayley H, Wallace MI. 2015. High-throughput optical sensing of  
649 nucleic acids in a nanopore array. *Nat Nanotechnol* **10**:986–991. doi:10.1038/nnano.2015.189
- 650 Jacobson K, Liu P, Lagerholm BC. 2019. The lateral organization and mobility of plasma membrane  
651 components. *Cell* **177**:806–819. doi:10.1016/j.cell.2019.04.018
- 652 Jin P, Jan LY, Jan Y-N. 2020. Mechanosensitive ion channels: structural features relevant to  
653 mechanotransduction mechanisms. *Annu Rev Neurosci* **43**:207–229. doi:10.1146/annurev-neuro-  
654 070918-050509
- 655 Joo C, Ha T. 2008. Single-molecule FRET with total internal reflection microscopy In: Selvin PR, Ha T,  
656 editors. *Single-Molecule Techniques: A Laboratory Manual*. Cold Spring Harbor Laboratory  
657 Press. pp. 3–36.
- 658 Kefauver JM, Ward AB, Patapoutian A. 2020. Discoveries in structure and physiology of mechanically  
659 activated ion channels. *Nature* **587**:567–576. doi:10.1038/s41586-020-2933-1
- 660 Kiessling V, Yang S-T, Tamm LK. 2015. Supported lipid bilayers as models for studying membrane  
661 domains In: Kenworthy AK, editor. *Current Topics in Membranes*. Academic Press. pp. 1–23.  
662 doi:10.1016/bs.ctm.2015.03.001
- 663 Koppel DE, Sheetz MP, Schindler M. 1981. Matrix control of protein diffusion in biological membranes.  
664 *Proc Natl Acad Sci* **78**:3576–3580. doi:10.1073/pnas.78.6.3576
- 665 Künkele K-P, Heins S, Dembowski M, Nargang FE, Benz R, Thieffry M, Walz J, Lill R, Nussberger S,  
666 Neupert W. 1998. The preprotein translocation channel of the outer membrane of mitochondria.  
667 *Cell* **93**:1009–1019. doi:10.1016/S0092-8674(00)81206-4
- 668 Kusumi A, Fujiwara TK, Chadda R, Xie M, Tsunoyama TA, Kalay Z, Kasai RS, Suzuki KGN. 2012.  
669 Dynamic organizing principles of the plasma membrane that regulate signal transduction:  
670 commemorating the fortieth anniversary of Singer and Nicolson’s fluid-mosaic model. *Annu Rev*  
671 *Cell Dev Biol* **28**:215–250. doi:10.1146/annurev-cellbio-100809-151736
- 672 Kuszak AJ, Jacobs D, Gurnev PA, Shiota T, Louis JM, Lithgow T, Bezrukov SM, Rostovtseva TK,  
673 Buchanan SK. 2015. Evidence of distinct channel conformations and substrate binding affinities  
674 for the mitochondrial outer membrane protein translocase pore Tom40. *J Biol Chem* **290**:26204–  
675 26217. doi:10.1074/jbc.M115.642173
- 676 Kuzmenko A, Tankov S, English BP, Tarassov I, Tenson T, Kamenski P, Elf J, Haurlyuk V. 2011. Single  
677 molecule tracking fluorescence microscopy in mitochondria reveals highly dynamic but confined  
678 movement of Tom40. *Sci Rep* **1**:195. doi:10.1038/srep00195
- 679 Lee CP, Makshev G, Jensen GS, Murcha MW, Wilson ME, Fricker M, Hell R, Haswell ES, Millar AH,  
680 Sweetlove L. 2016. MSL1 is a mechanosensitive ion channel that dissipates mitochondrial  
681 membrane potential and maintains redox homeostasis in mitochondria during abiotic stress. *Plant*  
682 *J Cell Mol Biol* **88**:809–825. doi:10.1111/tbj.13301
- 683 Lemeshko SV, Lemeshko VV. 2000. Metabolically derived potential on the outer membrane of  
684 mitochondria: a computational model. *Biophys J* **79**:2785–2800. doi:10.1016/S0006-  
685 3495(00)76518-0

- 686 Lemeshko VV. 2002. Model of the outer membrane potential generation by the inner membrane of  
687 mitochondria. *Biophys J* **82**:684–692. doi:10.1016/S0006-3495(02)75431-3
- 688 Leptihn S, Castell OK, Cronin B, Lee E-H, Gross LCM, Marshall DP, Thompson JR, Holden M, Wallace  
689 MI. 2013. Constructing droplet interface bilayers from the contact of aqueous droplets in oil. *Nat*  
690 *Protoc* **8**:1048–1057. doi:10.1038/nprot.2013.061
- 691 Li Y, Hu Y, Wang J, Liu X, Zhang W, Sun L. 2020. Structural insights into a plant mechanosensitive ion  
692 channel MSL1. *Cell Rep* **30**:4518–4527.e3. doi:10.1016/j.celrep.2020.03.026
- 693 Mager F, Gessmann D, Nussberger S, Zeth K. 2011. Functional refolding and characterization of two  
694 Tom40 isoforms from human mitochondria. *J Membr Biol* **242**:11–21. doi:10.1007/s00232-011-  
695 9372-8
- 696 Mahendran KR, Lamichhane U, Romero-Ruiz M, Nussberger S, Winterhalter M. 2013. Polypeptide  
697 translocation through the mitochondrial TOM channel: temperature-dependent rates at the single-  
698 molecule level. *J Phys Chem Lett* **4**:78–82. doi:10.1021/jz301790h
- 699 Martinac B. 2004. Mechanosensitive ion channels: molecules of mechanotransduction. *J Cell Sci*  
700 **117**:2449–2460. doi:10.1242/jcs.01232
- 701 Mokranjac D, Sichting M, Popov-Čeleketić D, Mapa K, Gevorkyan-Airapetov L, Zohary K, Hell K,  
702 Azem A, Neupert W. 2009. Role of Tim50 in the transfer of precursor proteins from the outer to  
703 the inner membrane of mitochondria. *Mol Biol Cell* **20**:1400–1407. doi:10.1091/mbc.e08-09-0934
- 704 Namba T. 2019. BAP31 regulates mitochondrial function via interaction with Tom40 within ER-  
705 mitochondria contact sites. *Sci Adv* **5**:eaaw1386. doi:10.1126/sciadv.aaw1386
- 706 Nawrocki G, Im W, Sugita Y, Feig M. 2019. Clustering and dynamics of crowded proteins near  
707 membranes and their influence on membrane bending. *Proc Natl Acad Sci* **116**:24562–24567.  
708 doi:10.1073/pnas.1910771116
- 709 Palmer CS, Lou J, Kouskousis B, Pandzic E, Anderson AJ, Kang Y, Hinde E, Stojanovski D. 2021. Super-  
710 resolution microscopy reveals the arrangement of inner membrane protein complexes in  
711 mammalian mitochondria. *J Cell Sci* **134**:1–11.
- 712 Pfanner N, Warscheid B, Wiedemann N. 2019. Mitochondrial protein organization: from biogenesis to  
713 networks and function. *Nat Rev Mol Cell Biol* **20**:267–284. doi:10.1038/s41580-018-0092-0
- 714 Pliotas C, Naismith JH. 2017. Spectator no more, the role of the membrane in regulating ion channel  
715 function. *Curr Opin Struct Biol* **45**:59–66. doi:10.1016/j.sbi.2016.10.017
- 716 Poynor M, Eckert R, Nussberger S. 2008. Dynamics of the preprotein translocation channel of the outer  
717 membrane of mitochondria. *Biophys J* **95**:1511–1522. doi:10.1529/biophysj.108.131003
- 718 Ramadurai S, Holt A, Krasnikov V, van den Bogaart G, Killian JA, Poolman B. 2009. Lateral diffusion  
719 of membrane proteins. *J Am Chem Soc* **131**:12650–12656. doi:10.1021/ja902853g
- 720 Rapaport D, Künkele K-P, Dembowski M, Ahting U, Nargang FE, Neupert W, Lill R. 1998. Dynamics  
721 of the TOM complex of mitochondria during binding and translocation of preproteins. *Mol Cell*  
722 *Biol* **18**:5256–5262. doi:10.1128/MCB.18.9.5256
- 723 Romero-Ruiz M, Mahendran KR, Eckert R, Winterhalter M, Nussberger S. 2010. Interactions of  
724 mitochondrial presequence peptides with the mitochondrial outer membrane preprotein  
725 translocase TOM. *Biophys J* **99**:774–781. doi:10.1016/j.bpj.2010.05.010
- 726 Sackmann E. 1996. Supported membranes: scientific and practical applications. *Science* **271**:43–48.  
727 doi:10.1126/science.271.5245.43
- 728 Schmidt O, Harbauer AB, Rao S, Eyrich B, Zahedi RP, Stojanovski D, Schönfish B, Guiard B, Sickmann  
729 A, Pfanner N, Meisinger C. 2011. Regulation of mitochondrial protein import by cytosolic  
730 kinases. *Cell* **144**:227–239. doi:10.1016/j.cell.2010.12.015
- 731 Scorrano L, De Matteis MA, Emr S, Giordano F, Hajnóczky G, Kornmann B, Lackner LL, Levine TP,  
732 Pellegrini L, Reinisch K, Rizzuto R, Simmen T, Stenmark H, Ungermann C, Schuldiner M. 2019.  
733 Coming together to define membrane contact sites. *Nat Commun* **10**:1287. doi:10.1038/s41467-  
734 019-09253-3

- 735 Shiota T, Imai K, Qiu J, Hewitt VL, Tan K, Shen H-H, Sakiyama N, Fukasawa Y, Hayat S, Kamiya M,  
736 Elofsson A, Tomii K, Horton P, Wiedemann N, Pfanner N, Lithgow T, Endo T. 2015. Molecular  
737 architecture of the active mitochondrial protein gate. *Science* **349**:1544–1548.  
738 doi:10.1126/science.aac6428
- 739 Sukhorukov VM, Dikov D, Busch K, Strecker V, Wittig I, Bereiter-Hahn J. 2010. Determination of  
740 protein mobility in mitochondrial membranes of living cells. *Biochim Biophys Acta - Biomembr*  
741 **1798**:2022–2032. doi:10.1016/j.bbamem.2010.07.016
- 742 Tanaka M, Sackmann E. 2005. Polymer-supported membranes as models of the cell surface. *Nature*  
743 **437**:656–663. doi:10.1038/nature04164
- 744 Teng J, Loukin S, Anishkin A, Kung C. 2015. The force-from-lipid (FFL) principle of  
745 mechanosensitivity, at large and in elements. *Pflüg Arch - Eur J Physiol* **467**:27–37.  
746 doi:10.1007/s00424-014-1530-2
- 747 Tucker K, Park E. 2019. Cryo-EM structure of the mitochondrial protein-import channel TOM complex  
748 at near-atomic resolution. *Nat Struct Mol Biol* **26**:1158–1166. doi:10.1038/s41594-019-0339-2
- 749 van der Laan M, Wiedemann N, Mick DU, Guiard B, Rehling P, Pfanner N. 2006. A role for Tim21 in  
750 membrane-potential-dependent preprotein sorting in mitochondria. *Curr Biol* **16**:2271–2276.  
751 doi:10.1016/j.cub.2006.10.025
- 752 van Wilpe S, Ryan MT, Hill K, Maarse AC, Meisinger C, Brix J, Dekker PJT, Moczko M, Wagner R,  
753 Meijer M, Guiard B, Hönlinger A, Pfanner N. 1999. Tom22 is a multifunctional organizer of the  
754 mitochondrial preprotein translocase. *Nature* **401**:485–489. doi:10.1038/46802
- 755 Vogel F, Bornhövd C, Neupert W, Reichert AS. 2006. Dynamic subcompartmentalization of the  
756 mitochondrial inner membrane. *J Cell Biol* **175**:237–247. doi:10.1083/jcb.200605138
- 757 Waegemann K, Popov-Čeleketić D, Neupert W, Azem A, Mokranjac D. 2015. Cooperation of TOM and  
758 TIM23 complexes during translocation of proteins into mitochondria. *J Mol Biol, Elucidation of*  
759 *Protein Translocation Pathways (Part I)* **427**:1075–1084. doi:10.1016/j.jmb.2014.07.015
- 760 Walewska A, Kulawiak B, Szewczyk A, Koprowski P. 2018. Mechanosensitivity of mitochondrial large-  
761 conductance calcium-activated potassium channels. *Biochim Biophys Acta BBA - Bioenerg*, 20th  
762 European Bioenergetics Conference **1859**:797–805. doi:10.1016/j.bbabbio.2018.05.006
- 763 Wang W, Chen X, Zhang L, Yi J, Ma Q, Yin J, Zhuo W, Gu J, Yang M. 2020. Atomic structure of human  
764 TOM core complex. *Cell Discov* **6**:1–10. doi:10.1038/s41421-020-00198-2
- 765 Wang Yang, Guo Y, Liu C, Wang L, Zhang A, Yan Z, Song C. 2019. Push-to-open: the gating mechanism  
766 of the tethered mechanosensitive ion channel NompC. *bioRxiv* 853721. doi:10.1101/853721
- 767 Wang Y, Yan S, Zhang P, Zeng Z, Zhao D, Wang J, Chen H, Huang S. 2018. Osmosis-driven motion-  
768 type modulation of biological nanopores for parallel optical nucleic acid sensing. *ACS Appl Mater*  
769 *Interfaces* **10**:7788–7797. doi:10.1021/acsami.7b18347
- 770 Wang Yuqin, Wang Yu, Du X, Yan S, Zhang P, Chen H-Y, Huang S. 2019. Electrode-free nanopore  
771 sensing by DiffusiOptoPhysiology. *Sci Adv* **5**:eaar3309.
- 772 Wiedemann N, Pfanner N. 2017. Mitochondrial machineries for protein import and assembly. *Annu Rev*  
773 *Biochem* **86**:685–714. doi:10.1146/annurev-biochem-060815-014352
- 774 Wurm CA, Neumann D, Lauterbach MA, Harke B, Egner A, Hell SW, Jakobs S. 2011. Nanoscale  
775 distribution of mitochondrial import receptor Tom20 is adjusted to cellular conditions and exhibits  
776 an inner-cellular gradient. *Proc Natl Acad Sci* **108**:13546–13551. doi:10.1073/pnas.1107553108
- 777
- 778

## 779 Acknowledgments

780

781 We thank Beate Nitschke for help with protein preparation, and Stephan Eisler and Ke Zhou for  
782 help with the TIRF microscopy. We thank Robin Ghosh, for stimulating discussion, and the  
783 Baden-Württemberg Foundation for funding (BiofMO-6, SN).

784



785 **Author contributions:**

786  
787 SN initiated and directed the study. SW fluorescently labeled proteins, collected and processed  
788 the TIRF data. MH and SW wrote the software used for data and statistical analysis. SW, MH and  
789 SN analyzed results. SN wrote the initial paper draft and secured funding. SW, MW, MH and SN  
790 edited and reviewed the draft. LF, SL and MW provided initial expertise.  
791

792  
793 **Competing interests:**

794  
795 All authors declare that they have no competing interests.  
796  
797  
798  
799

## Figures

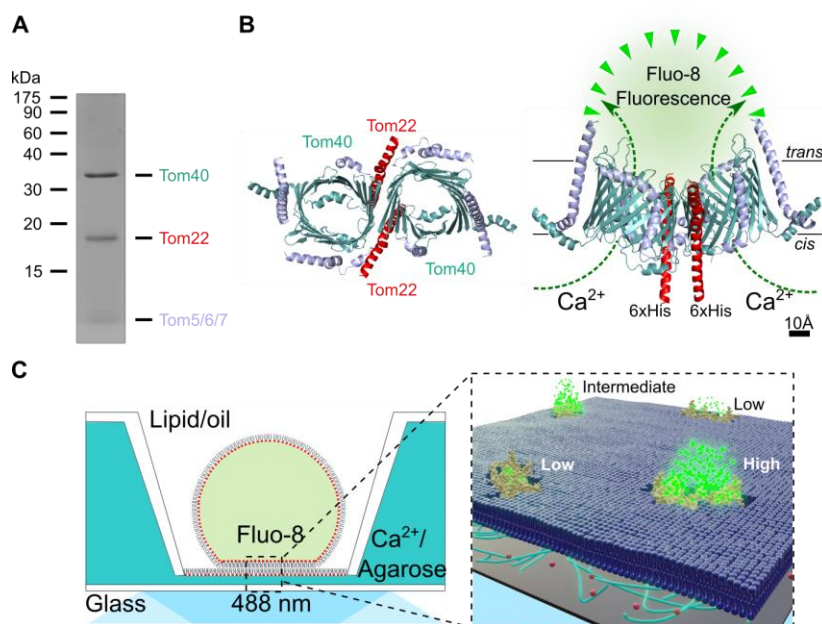

**Fig. 1. Scheme for tracking single TOM-CC molecules and imaging their ion channel activity.** (A) TOM-CC was isolated from mitochondria of a *Neurospora* strain carrying a Tom22 with a hexahistidinyl tag (6xHis). Analysis of purified protein by SDS-polyacrylamide gel electrophoresis (SDS-PAGE) followed by Coomassie Blue staining revealed all known subunits of the core complex, Tom40, Tom22, Tom7, Tom6 and Tom5. The small subunits Tom7, Tom6 and Tom5 are not separated by SDS-PAGE. (B) Atomic model based on the cryoEM map of *N. crassa* TOM core complex (EMDB, EMD-3761; (Bausewein et al., 2020, 2017)). The ionic pathway through the two aqueous  $\beta$ -barrel Tom40 pores is used to optically study the open-closed channel activity of individual TOM-CCs. Left, cytosolic view; right, side view; *cis*, mitochondria intermembrane space; *trans*, cytosol. Tom7, Tom6 and Tom5 are not labeled for clarity. (C) Single molecule tracking and channel activity sensing of TOM-CC in DIB membranes using electrode-free optical single-channel recording (Ef-oSCR). Left: Membranes are created through contact of lipid monolayer-coated aqueous droplets in a lipid/oil phase and a lipid monolayer on top of an agarose hydrogel. The *cis* side of the membrane contained  $\text{Ca}^{2+}$ -ions, while having a  $\text{Ca}^{2+}$ -sensitive fluorescent dye (Fluo-8) at the *trans* side. Right:  $\text{Ca}^{2+}$ -ion flux through individual TOM-CCs from *cis* to *trans* is driven by a  $\text{Ca}^{2+}$  concentration gradient, established around the two Tom40 pores, and measured by monitoring Fluo-8 emission in close proximity to the membrane using TIRF microscopy. Fluorescence signals reveal the local position of individual TOM-CCs, which is used to determine their mode of lateral diffusion in the membrane. The level of the fluorescence (high, intermediate and low intensity) correlates with corresponding permeability states of a TOM-CC molecule. A 100x TIRF objective is used both for illumination and imaging. Green dots, fluorescent Fluo-8; red dots,  $\text{Ca}^{2+}$  ions.

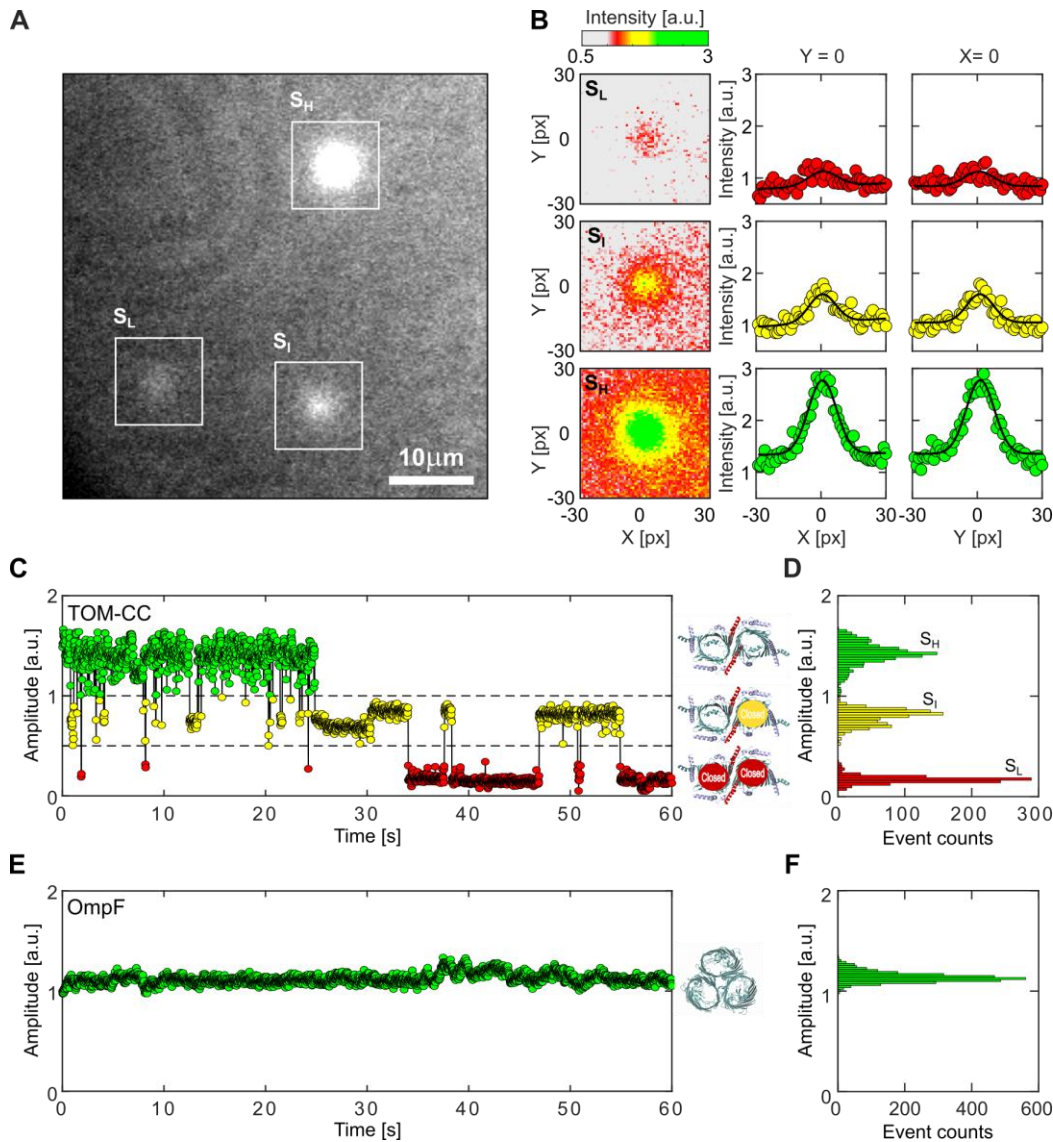

**Fig. 2. Visualizing the two pore channel activity of TOM-CC.** (A) Typical image ( $N > 5.3 \times 10^5$ ) of a non-modified agarose-supported DIB membrane with TOM-CC channels under 488 nm TIRF-illumination. The white squares mark spots of high ( $S_H$ ), intermediate ( $S_I$ ) and low ( $S_L$ ) intensity (Movie S1). (B) Fitting the fluorescence intensity profile of the three spots marked in (A) to two-dimensional Gaussian functions (Movie S2). Red, yellow and green intensity profiles represent TOM-CC in  $S_L$ ,  $S_I$  and  $S_H$  demonstrating Tom40 channels, which are fully closed, one and two channels open, respectively. Pixel size, 0.16  $\mu\text{m}$ . (C) Fluorescence amplitude trace and (D) amplitude histogram of the two-pore  $\beta$ -barrel protein channel TOM-CC. The TOM-CC channel switches between  $S_H$ ,  $S_I$ , and  $S_L$  permeability states over time. Inserts, schematic of *N. crassa* TOM core complex with two pores open in  $S_H$  (top), one pore open in  $S_I$  (middle), and two pores closed in  $S_L$  (bottom) (EMDB, EMD-3761; (Bausewein et al., 2020, 2017)); (E) Representative single-channel optical recording and (F) amplitude histogram of the three-pore  $\beta$ -barrel protein OmpF used as a control, which is completely embedded in the lipid bilayer. In contrast to the two-pore  $\beta$ -barrel protein complex TOM-CC, OmpF exhibits only one permeability state over time. Insert, model of *E. coli* OmpF (PDB, 1OPF) with all three pores open. Data were acquired by Ef-oSCR as described in Fig.1C at a frame rate of 47.5  $\text{s}^{-1}$ .

893  
894  
895  
896  
897  
898  
899  
900  
901  
902  
903  
904  
905  
906  
907  
908  
909  
910  
911  
912  
913  
914  
915  
916  
917  
918  
919  
920  
921  
922  
923  
924  
925  
926  
927  
928  
929  
930  
931  
932  
933  
934  
935  
936  
937  
938  
939  
940  
941  
942  
943  
944  
945  
946  
947  
948  
949

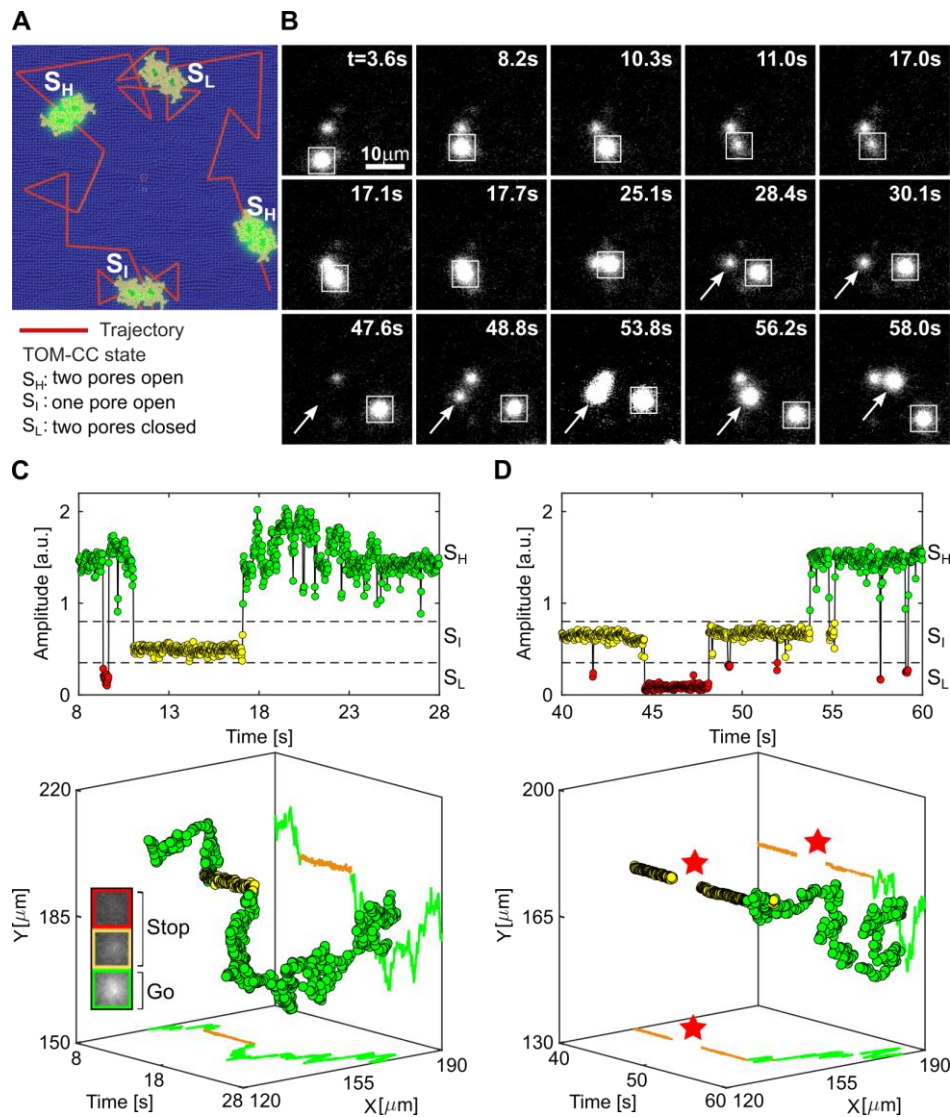

**Fig. 3. Lateral mobility correlates with the channel activity of TOM-CC.** (A) Scheme for imaging both position and channel activity of single TOM-CCs. (B) Representative TIRF microscopy images of a non-modified agarose-supported DIB membrane with three TOM-CC molecules taken from a time series of 60 s. The square-marked spot displays lateral motion, interrupted by a transient arrest between  $t = 11.0$  s and  $t = 17.0$  s. The arrow-marked spot corresponds to a non-moving TOM-CC until  $t = 48.8$  s. Afterwards, it starts moving. Both moving spots show high fluorescence intensity ( $S_H$ ); the non-moving spots display intermediate ( $S_I$ ) or dark ( $S_L$ ) fluorescence intensity (Movie S3). (C and D) Fluorescent amplitude trace and corresponding trajectory of the square- and arrow- marked TOM-CC as shown in (B) highlighted for two different time windows. Plots on top shows the change of amplitude over time, and plots on the bottom show the respective spatiotemporal dynamics for the three states. Comparison of the trajectories of single TOM-CC molecules with their corresponding amplitude traces reveals a direct correlation between *stop-and-go* movement and open-closed channel activity. Lateral diffusion of TOM-CCs in the DIB membrane is interrupted by temporary arrest, presumably due to transient linkage to the underlying agarose hydrogel. Although weak intensity profiles in  $S_I$  do not allow accurate position determination, the fluorescent spots disappear and reappear at the same spatial x,y coordinates (red stars). The higher amplitude (C, top) between  $t = 17.1$  s and  $t = 25.1$  s is due to the overlap between two adjacent spots. Green, TOM-CC is freely diffusive in  $S_H$ ; yellow and red, immobile TOM-CC in  $S_I$  and  $S_L$ . Data were acquired by Ef-oSCR as described in Fig.1C at a frame rate of  $47.5 \text{ s}^{-1}$ . A total of  $n_{\text{TOM}} = 64$  amplitude traces and trajectories were analyzed.



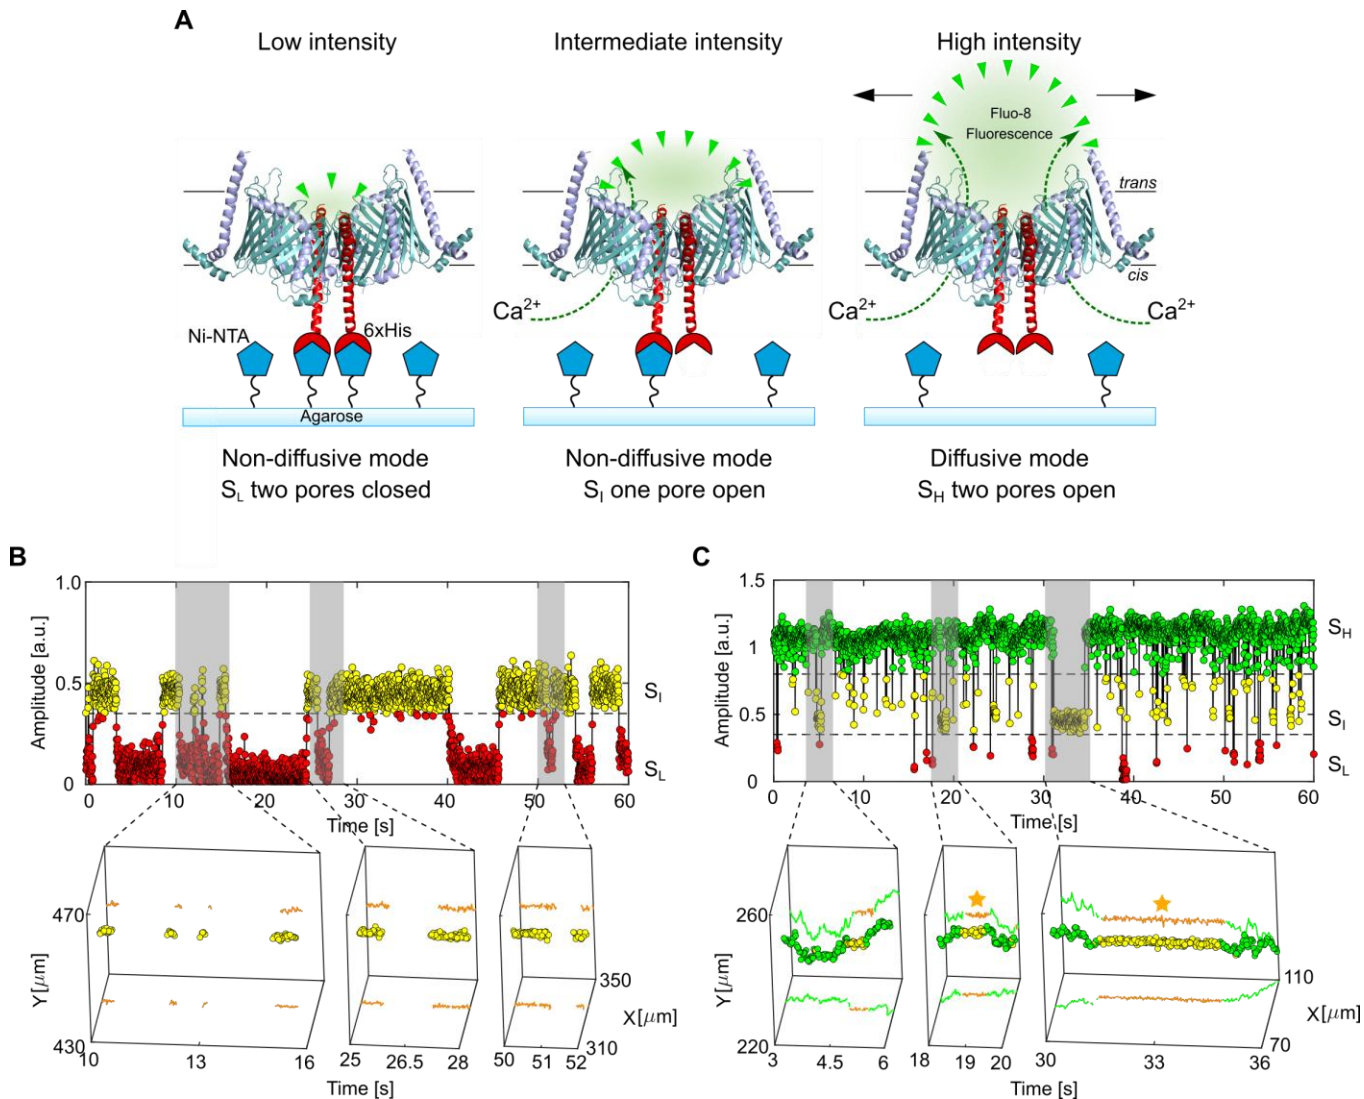

986  
987  
988  
989  
990  
991  
992  
993  
994  
995  
996  
997  
998  
999  
1000  
1001  
1002  
1003  
1004

**Fig. 4. Controlled immobilization of TOM-CC triggers channel closures.** (A) Schematic representation of individual TOM-CC channels in DIB membranes supported by Ni-NTA-modified agarose. TOM-CC molecules can be permanently linked to the underlying hydrogel via His-tagged Tom22. Tethered and non-tethered TOM-CC molecules in closed ( $S_I$  and  $S_L$ ) and open ( $S_H$ ) states are indicated, respectively. (B) Fluorescent amplitude trace (top) of a TOM-CC channel permanently tethered to Ni-NTA-modified agarose. The trajectory segments (bottom) correspond to the time periods of the amplitude traces marked in grey (Movie S6: bottom). Non-diffusive, permanently immobilized TOM-CC is only found in  $S_I$  or  $S_L$ , indicating that tight binding of the His-tagged Tom22 domain (Fig. 1B) to Ni-NTA-modified agarose triggers closure of the  $\beta$ -barrel TOM-CC pores. (C) Fluorescence amplitude trace (top) of a TOM-CC channel transiently and non-specifically entangled by Ni-NTA-modified agarose. The trajectory segments (bottom) correspond to the time periods of the amplitude traces marked in grey (Movie S6 bottom). The movement of TOM-CC is interrupted twice at the same spatial  $x,y$  membrane position from  $t_1 = 18.56$  s to  $t_2 = 19.19$  s and from  $t_3 = 31.14$  s to  $t_4 = 34.55$  s (yellow stars). Consistent with the data shown in Fig. 3, moving TOM-CC molecules in diffusive mode are found in the fully open  $S_H$  state; transient tethering causes the TOM-CC  $\beta$ -barrels to close. Data were acquired by Ef-oSCR as described in Fig.1C at a frame rate of  $47.5\text{ s}^{-1}$ . A total of  $n_{\text{TOM}} = 123$  amplitude traces and trajectories were analyzed.

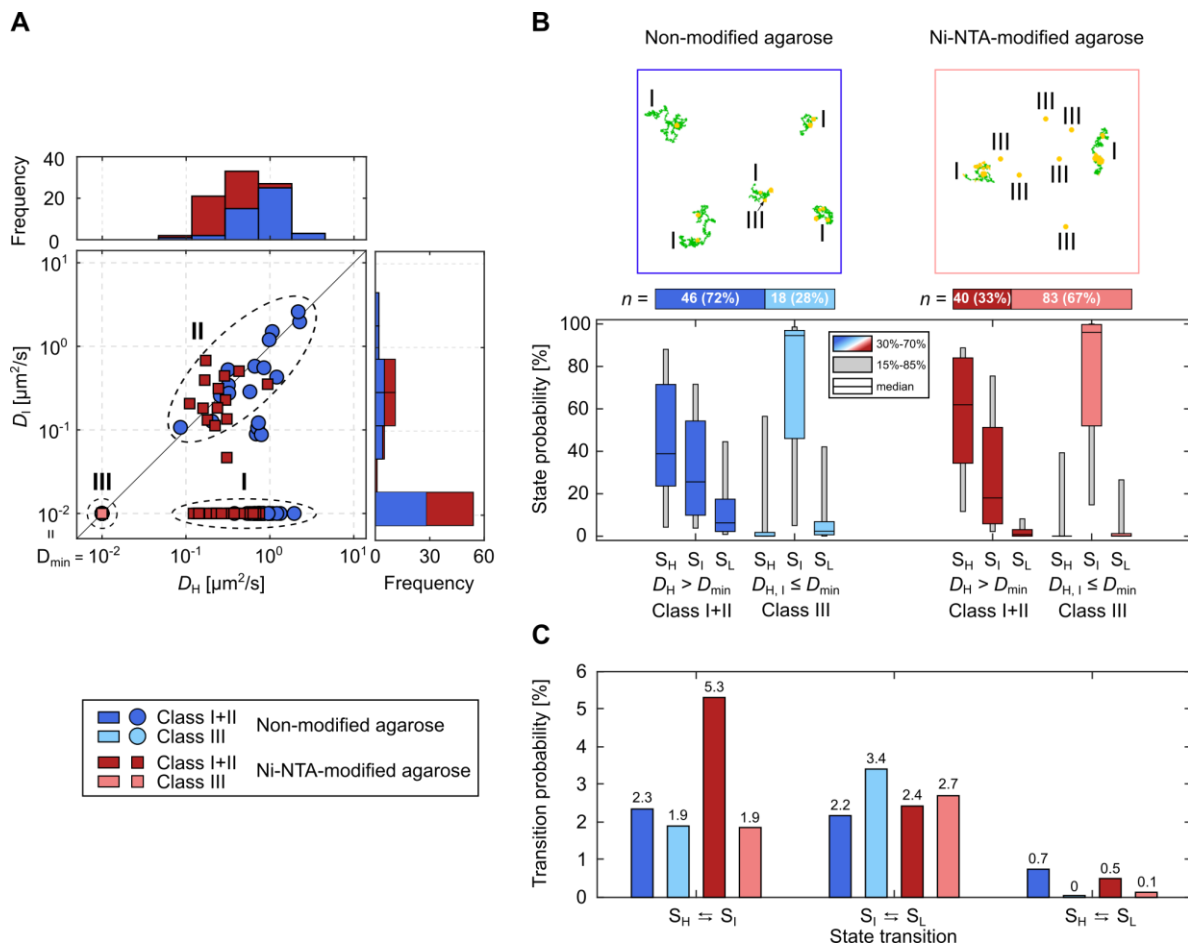

**Fig. 5. Statistical correlation between channel activity and lateral mobility of TOM-CC.** (A)  $D_I$  as a function of  $D_H$  individually plotted for all TOM-CC molecules in DIB membranes supported by non-modified (dark blue and light blue,  $n = 64$ ) and Ni-NTA modified agarose (dark red and light red,  $n = 123$ ). Frequency histograms of  $D_H$  and  $D_I$  are shown on top and right side, respectively. Three classes can be defined: a main class of moving particles in  $S_H$  while being transiently tethered at  $S_I$  (I), a second class of freely moving particles in  $S_H$  and  $S_I$  (II) and a third class of permanently tethered molecules in  $S_I$  and  $S_L$  (III). (B) Example trajectories (top and Movie S6) and state probabilities (bottom) of non-permanently ( $D_H > D_{\min}$ , class I+II) and permanently tethered ( $D_{H,I} \leq D_{\min}$ , class III) TOM-CC in DIBs supported by non-modified and Ni-NTA-modified agarose. The probability of being in state  $S_H$  is higher for non-permanently ( $D_H > D_{\min}$ , class I+II, dark blue [ $n = 46$ ] and dark red [ $n = 40$ ]) than for permanently tethered molecules ( $D_{H,I} \leq D_{\min}$ , class III, light blue [ $n = 18$ ] and light red [ $n = 83$ ]). The probability of being in state  $S_I$  is significantly higher for permanently ( $D_{H,I} \leq D_{\min}$ , class III) than for non-permanently tethered particles ( $D_H > D_{\min}$ , class I+II). This suggests that binding of Tom22 to Ni-NTA agarose below the membrane triggers closure of the TOM-CC channels. The data are represented as median; the confidence intervals are given between 15% to 85% and 30% to 70%. Moving particles in  $S_H$  are shown in the trajectories in green; transiently or permanently tethered molecules in  $S_I$  are shown in yellow. (C) Absolute state transition probabilities classified by bidirectional state transitions as  $S_H \rightleftharpoons S_I$ ,  $S_I \rightleftharpoons S_L$ , and  $S_H \rightleftharpoons S_L$ . Diffusive TOM-CC molecules have a significantly higher transition probability for switching between  $S_H$  and  $S_I$  in DIBs supported by Ni-NTA-modified agarose (~5.3%) than in non-modified agarose membranes (~2.3%). This is consistent with the higher efficacy of TOM-CC-trapping by Ni-NTA-modified agarose compared to non-modified agarose. Classification of non-permanently and permanently tethered TOM-CC is shown at the left bottom.

## Supplementary Materials

### **Correlation of mitochondrial TOM core complex *stop-and-go* and open-closed channel dynamics**

Shuo Wang, Lukas Findeisen, Sebastian Leptihn, Mark I. Wallace, Marcel Hörning\*, Stephan Nussberger\*

\*Corresponding author. Email: [Stephan.Nussberger@bio.uni-stuttgart.de](mailto:Stephan.Nussberger@bio.uni-stuttgart.de), [Marcel.Hoerning@bio.uni-stuttgart.de](mailto:Marcel.Hoerning@bio.uni-stuttgart.de)

#### **This PDF file includes:**

Figs. S1 to S5

Movie captions S1 to S6

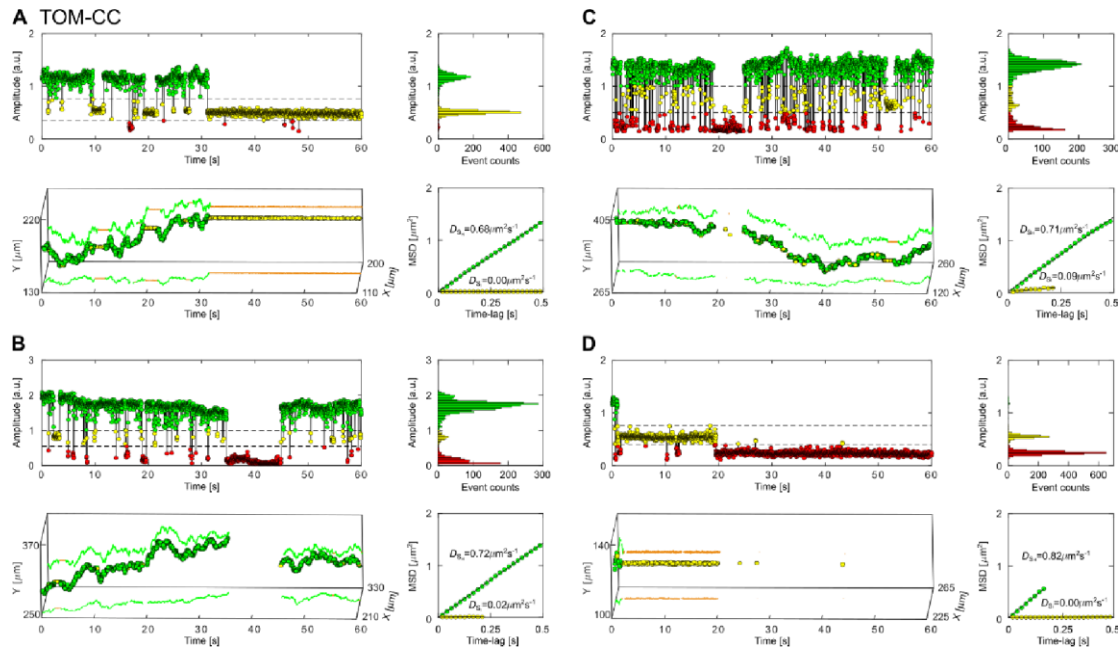

**Fig. S1. Lateral mobility correlates with the open-closed channel activity of TOM-CC.**

(A, B, C and D) Representative fluorescent amplitude traces of individual TOM-CC channels recorded in nonmodified agarose-supported DIB membranes. The amplitude recordings and trajectories indicate that the open-closed channel activity of TOM-CC correlates with the lateral membrane mobility of the complex. The fluorescent amplitude traces (upper left) and corresponding amplitude histograms (upper right) show three distinct ion permeation states ( $S_H$ , green;  $S_I$ , yellow;  $S_L$ , red). The trajectories (bottom left) display two mobility states, moving (green) and non-moving (yellow). The mean square displacement (MSD, bottom right) increases linearly with time when TOM-CC is in  $S_H$  state. The MSD does not change with time for TOM in the  $S_I$  state. Due to limited resolution, trajectory points and MSD-plots are not shown for TOM-CC in the low permeation state  $S_L$ .



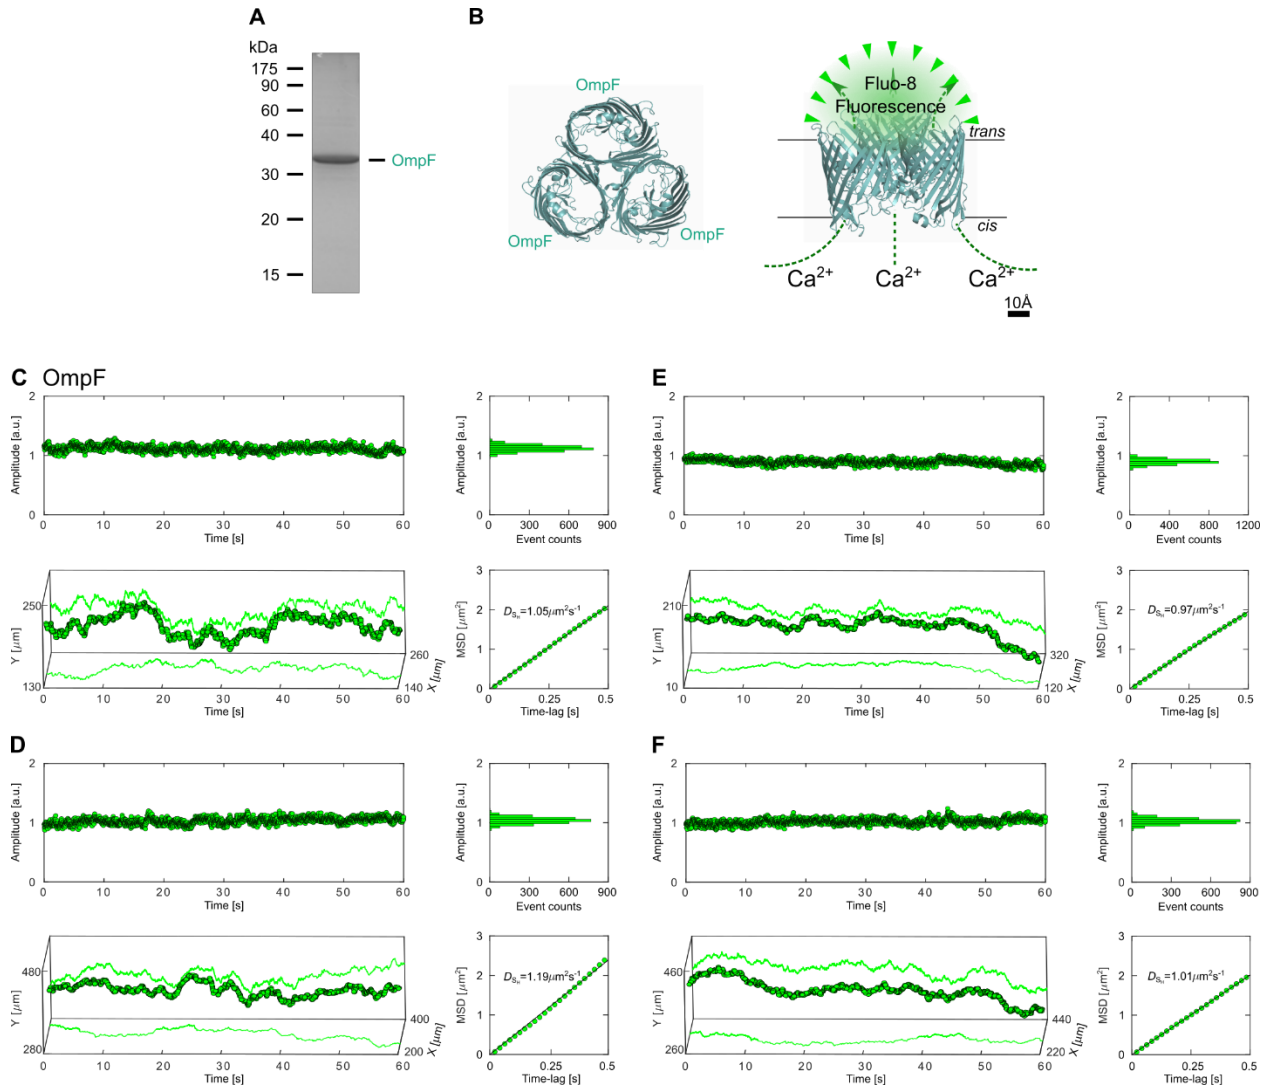

**Fig. S2. Lateral mobility does not influence the open-closed channel activity of OmpF.**

(A) SDS-PAGE of OmpF. The protein was purified from *E. coli* membranes by differential SDS extraction at 50°C and 37°C, respectively. (B) Atomic model of OmpF (PDB, 1OPF). Left, view from the extracellular side; right, side view.  $\text{Ca}^{2+}$  flux through the three  $\beta$ -barrel pores is measured by electrode-free optical single channel recording (Ef-oSCR) using Fluo-8 as  $\text{Ca}^{2+}$ -sensitive dye, as described in Fig. 1. (C, D, E and F) Representative fluorescent amplitude traces of individual OmpF channels ( $n = 42$ ) recorded in agarose-supported DIB membranes. The amplitude recordings and trajectories of the four examples indicate that the open-closed channel activity of OmpF does not correlate with the lateral mobility of the protein. OmpF displays only one ion permeation and lateral membrane mobility state, despite the fact that three channels are indicated in the atomic structure.

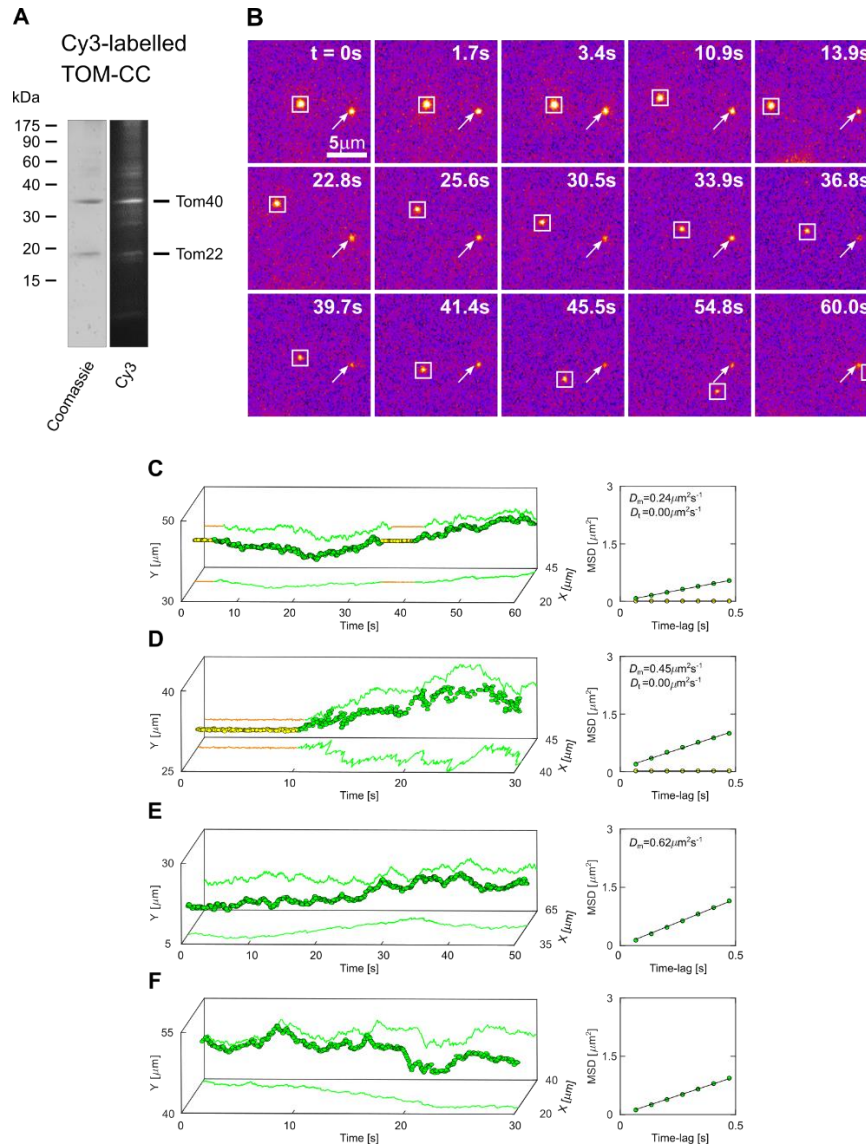

**Fig. S3. Tracking fluorescent-labeled TOM-CC in non-modified agarose supported DIB membranes.** (A) SDS-PAGE of Cy3-labeled TOM-CC analyzed by Coomassie Blue staining and Cy3 fluorescence, respectively. (B) Representative TIRF microscopy images of a DIB membrane with two Cy3-labeled TOM-CC molecules ( $n = 15$ ) taken from a time series of 60 s (Movie S4). The square-marked spot displays lateral motion, interrupted by a transient arrest between  $t = 0$  s and  $t = 3.3$  s, and between  $t = 33.9$  s and  $t = 39.4$  s. The arrow-marked spot corresponds to a non-moving TOM-CC. (C) Trajectory and diffusion coefficient of the squaremarked Cy3-labeled TOM-CC. (D, E and F) Trajectories and diffusion coefficients of additional Cy3-labeled TOM-CCs. The color-coding of trajectories is the same as in Fig. 3. Note that the freely moving TOM-CC molecule in Figures B and C stops at the same spatial x,y-position when it sweeps this position a second time, indicating a specific molecular trap or anchor point at this position below the membrane.

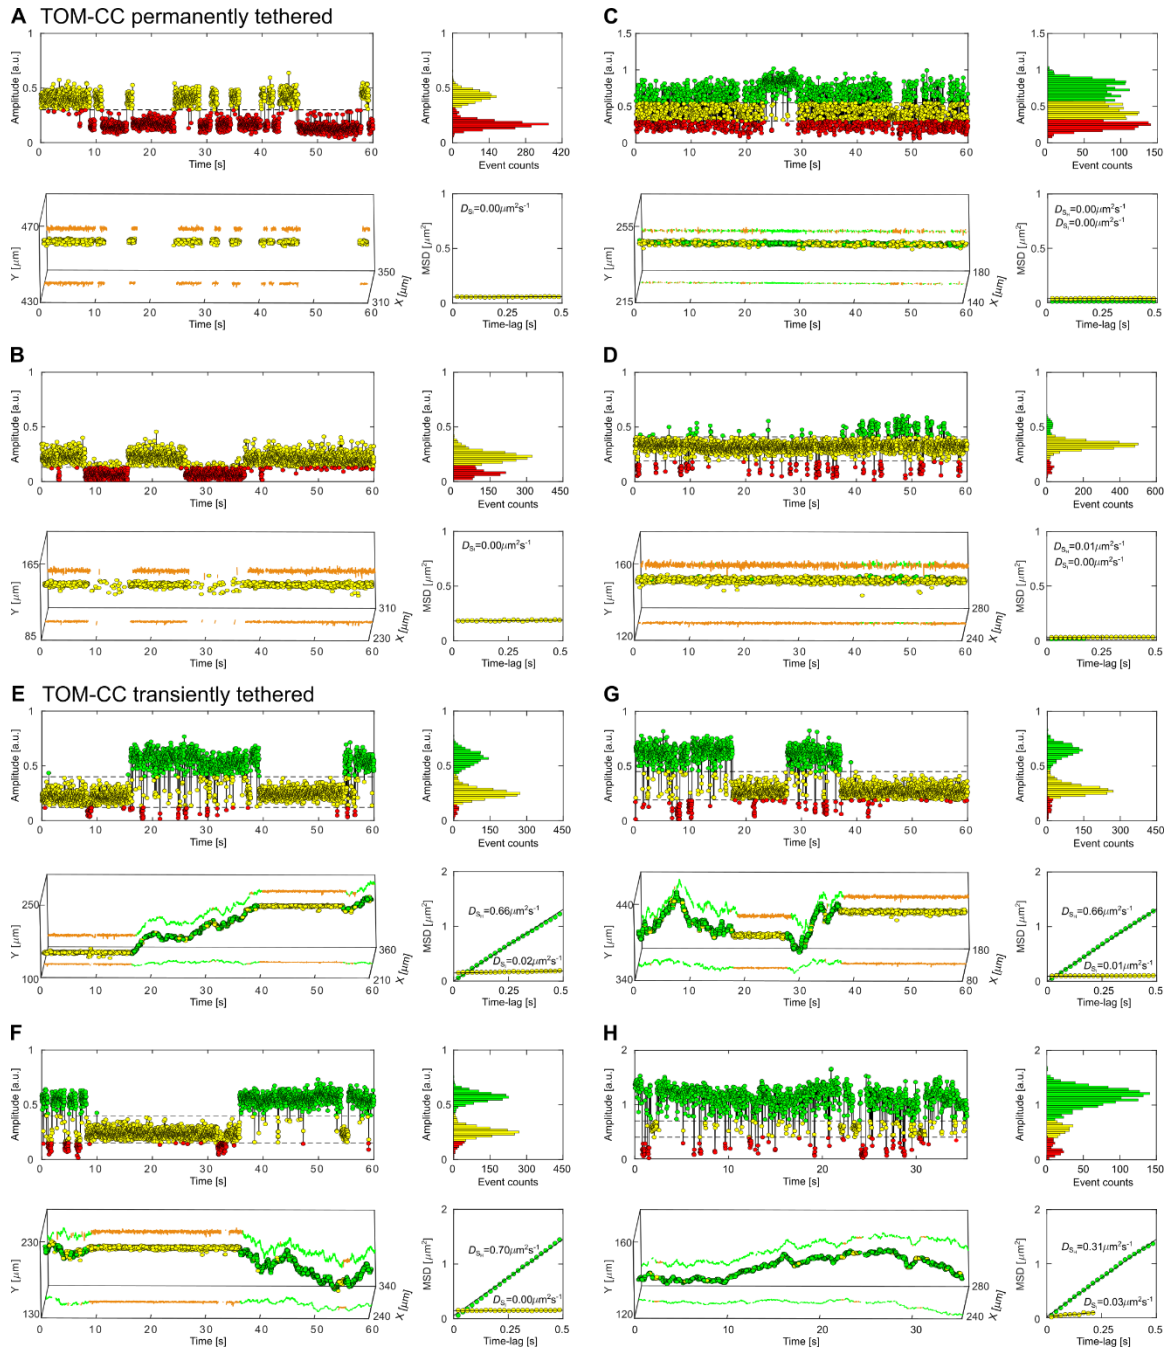

**Fig. S4. Controlled immobilization of His-tagged TOM-CC triggers channel closures.** Representative fluorescent amplitude traces of individual TOM-CC channels ( $n = 109$ ) recorded in Ni-NTA-modified agarose-supported DIB membranes. (A, B, C and D) Particles are permanently trapped. (E, F, G and H) Particles are transiently trapped. Fluorescent amplitude traces (upper left), amplitude histograms (upper right), trajectories (bottom left) and mean square displacement plots (MSD, bottom right) are similar to those shown in Figs. 4B and 4C, respectively. The color-coding is the same as in Fig. 2.

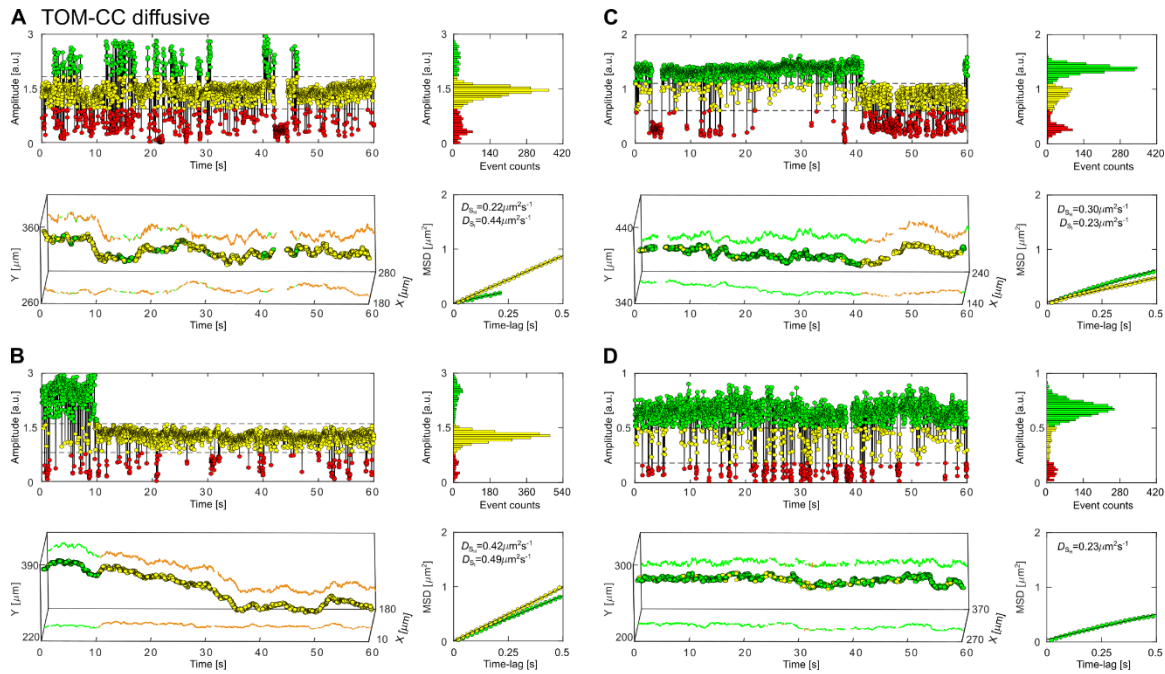

**Fig. S5. Lateral mobility and open-closed channel activity of TOM-CC in Ni-NTA-modified agarose supported DIB membranes.** (A, B, C and D) Fluorescent amplitude traces (upper left), amplitude histograms (upper right), trajectories (bottom left) and mean square displacement plots (MSD, bottom right) are shown. Particles ( $n = 14$ ) are continuously moving and represent nontypical TOM-CCs. The color-coding is the same as in Fig. 2.



**Movie S1. Imaging the channel activity of single TOM-CC molecules, related to Fig. 2A.** A  $\text{Ca}^{2+}$  indicator dye (Fluo-8) is used to monitor  $\text{Ca}^{2+}$ -flux through individual TOM-CC channels in a non-modified agarose-supported DIB membrane using electrode-free optical single channel recording (Ef-oSCR). TOM-CCs appear as bright spots under 488 nm TIRF-illumination. The spots show high and intermediate intensity corresponding to two conformational states  $S_H$  (green) and  $S_I$  (yellow) with two pores and one pore open, respectively. The low intensity level represents a conformation  $S_L$  (red) with both pores closed. Raw image data are shown; individual spots are marked according to their conformational states.

**Movie S2. Time evolution of TOM-CC channel activity, related to Figs. 2B - 2C.** Fitting the fluorescence intensity profiles of a single TOM-CC to two-dimensional Gaussian functions (right). Red, yellow and green intensity profiles represent TOM-CC in  $S_L$ ,  $S_I$  and  $S_H$  demonstrating Tom40 channels, which are fully closed, one, and two channels open, respectively. Original fluorescence intensities (left) were recorded at a pixel size of  $0.16 \mu\text{m}$  and at a frame rate of  $47.51 \text{ s}^{-1}$ . No bleach correction and filter algorithm were applied.

**Movie S3. Correlation between stop-and-go dynamics and open-closed channel activity of single TOM-CC molecules, related to Fig. 3.** TIRF image recording (left) and trajectories (right) of individual TOM-CC molecules in a non-modified agarose supported DIB membrane. The square-marked spots display lateral motion (Go) interrupted by transient arrest (Stop). The red, yellow and green color coding corresponds to TOM-CC molecules, which are fully closed ( $S_L$ ), one ( $S_I$ ) and two ( $S_H$ ) channels open, respectively. Moving TOM-CC molecules in  $S_H$  switch to  $S_I$  or  $S_L$  when they stop in the DIB membrane. Raw image data are shown; individual spots are marked according to their conformational states (left). The trajectories of moving TOM-CC molecules are colored in green; the trajectories of trapped TOM-CC molecules in  $S_I$  are colored in yellow; the trajectories of trapped TOM-CC molecules in  $S_L$  are not shown because weak intensity profiles do not allow accurate determination of the position of TOM-CC in the membrane plane.

**Movie S4. Stop-and-go movement of fluorescently labeled TOM-CC, related to Fig. S3.** TIRF image recording (left) and trajectories (right) of Cy3-labeled TOM-CC molecules in a non-modified agarose supported DIB membrane. The square-marked spots display lateral motion (Go, green), interrupted by a transient arrest (Stop, yellow). Note that the freely moving TOMCC molecule stops at the same spatial x,y-position (yellow cross) when it crosses the same position a second time, indicating a specific molecular trap or anchor point at this position below the membrane. Raw image data are shown. Grey scales of individual images are transformed into pseudo colour images to better display movement of fluorescently labelled TOM-CC molecules. No bleach correction and filter algorithm were applied.

**Movie S5. Lateral movement and channel activity of single OmpF molecules, related to Figs. 2E - 2F, and Fig. S2.** TIRF image recording (left) and trajectories (right) of single OmpF molecules in a non-modified agarose supported DIB membrane. A  $\text{Ca}^{2+}$  indicator dye (Fluo-8) is used to monitor  $\text{Ca}^{2+}$ -flux through three-pore  $\beta$ -barrel OmpF channels using electrode-free optical single channel recording (Ef-oSCR). OmpF appears as bright spots under 488 nm TIRF illumination. The channel activity of OmpF does not correlate with the lateral mobility of the

protein. OmpF displays only one ion permeation and lateral membrane mobility state. Raw image data are shown and individual spots are marked.

**Movie S6. Single channel activity of transiently and permanently trapped TOM-CC molecules, related to Figs. 3, 4 and 5.** TIRF image recordings (left) and trajectories (right) of single TOM-CC molecules in non-modified (top) and Ni-NTA-modified (bottom) agarose supported DIB membranes. The spots show high and intermediate intensity corresponding to two conformational states  $S_H$  (green) and  $S_I$  (yellow) with two pores and one pore open, respectively. The low intensity level represents a conformation  $S_L$  (red) with both pores closed. Diffusive TOM-CC molecules are only in  $S_H$  state. Non-diffusive molecules are either in  $S_I$  or  $S_L$ . The permanently tethered fraction of TOM-CC in Ni-NTA-modified agarose is significantly larger compared to the fraction in non-modified agarose over time. Raw image data are shown; individual spots are marked according to their conformational states; trajectories of trapped TOM-CC molecules in  $S_L$  are not shown because weak intensity profiles do not allow accurate determination of the position of TOM-CC in the membrane plane. Original fluorescence intensities were recorded at a pixel size of 0.16  $\mu\text{m}$  and at a frame rate of 47.51  $\text{s}^{-1}$ .
